# Supplementary material for: A simple array integrating machine learning for identification of flavonoids in red wines
Source: PubMed Central journal article supplement — RSC Adv. 2023 Mar 16;13(13):8882–9. doi: 10.1039/d2ra08049d (PMC10019168; doi:10.1039/d2ra08049d), 2023-03-16
Supplement: RA-013-D2RA08049D-s001.pdf [file RA-013-D2RA08049D-s001.pdf]

## Supporting Information

### A Simple Array Integrating Machine Learning for Identification of Flavonoids in Red Wines

Jiaojiao Qin,<sup>b, #</sup> Hao Wang,<sup>b, #</sup> Yu Xu,<sup>b, #</sup> Fangfang Shi,<sup>b</sup> Shijie Yang,<sup>b</sup>  
Hui Huang,<sup>c, \*</sup> Jun Liu,<sup>d</sup> Callum Stewart,<sup>c</sup> Linxian Li,<sup>c</sup> Fei Li,<sup>b</sup> Jinsong  
Han,<sup>b, \*</sup> Wenwen Wu<sup>a, \*</sup>

<sup>a</sup> *Department of Pharmacy, Children's Hospital of Nanjing Medical University,  
Nanjing, Jiangsu Province, 211109, China.*

<sup>b</sup> *State Key Laboratory of Natural Medicines and National R&D Center for Chinese  
Herbal Medicine Processing, Department of Food Quality and Safety, College of  
Engineering, China Pharmaceutical University, 211109, China*

<sup>c</sup> *Ming Wai Lau Centre for Reparative Medicine, Karolinska Institutet, Sweden*

<sup>d</sup> *Shandong Yuwang Ecological Food Industry Co., Ltd., De Zhou, 251200, China*

<sup>#</sup> These authors made equal contributions to this work.

## 1. General Information

**Machine learning algorithms:** Eight machine learning algorithms, including Support Vector Machine (SVM), Decision Tree (DT), K-nearest Neighbor (KNN), Random Forest (RF), Gaussian Process Classifier (GPC), Naïve Bayes (NB), Logistic Regression (LR) and Linear Discriminant Analysis (LDA), were built in Python using the scikit-learn package, which is an open-source tool for data analysis and machine learning (<https://github.com/scikit-learn/scikit-learn>).

**Linear discriminant analysis:** Linear discriminant analysis was carried out using classical linear discriminant analysis (LDA) in SYSTAT (version 13.0). In LDA, all variables were used in the model (complete model) and the tolerance was set as 0.001. The fluorescence response patterns were transformed into canonical patterns. The Mahalanobis distances of each individual pattern to the centroid of each group in a multidimensional space were calculated and the assignment of the case was based on the shortest Mahalanobis distance.

## 2. The Information of Flavonoids

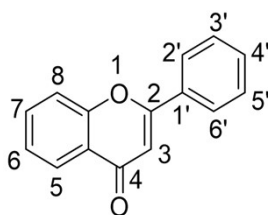

**Fig. S1** Basic skeleton structure of flavonoids

Flavonoids use C6-C3-C6 as the basic skeleton and are composed of two aromatic rings connected to each other through a central three-carbon chain.

## 3. Synthesized procedure of PDIs

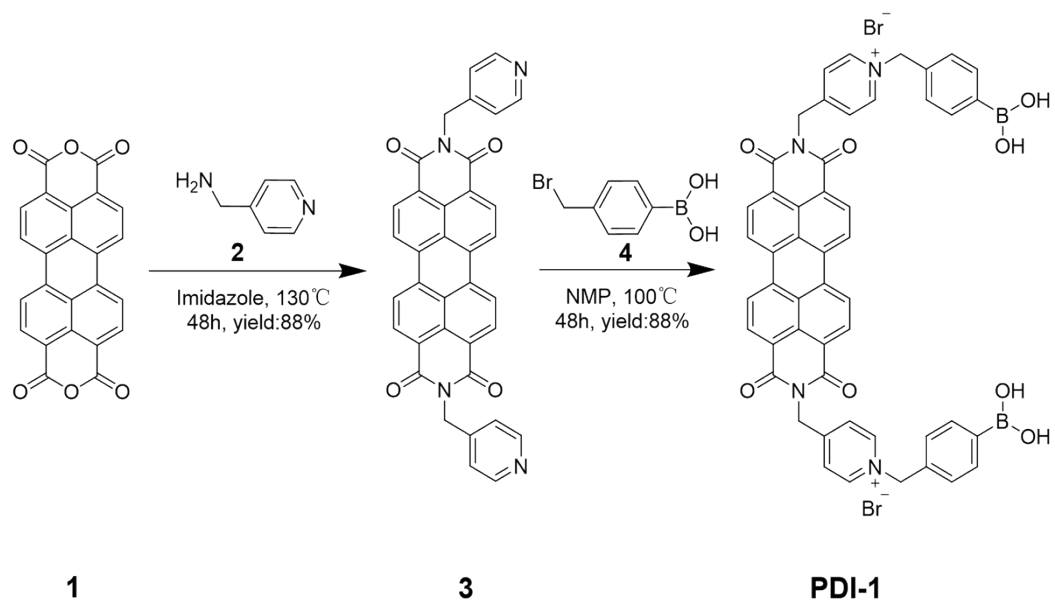

**Fig. S2 Synthetic routes of PDI-1.**

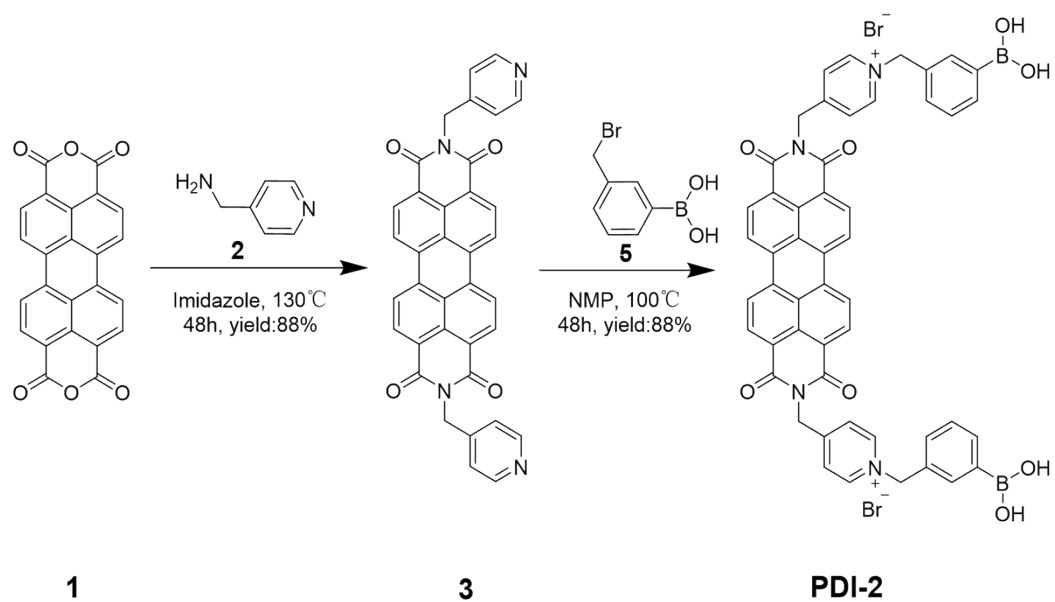

**Fig. S3 Synthetic routes of PDI-2.**

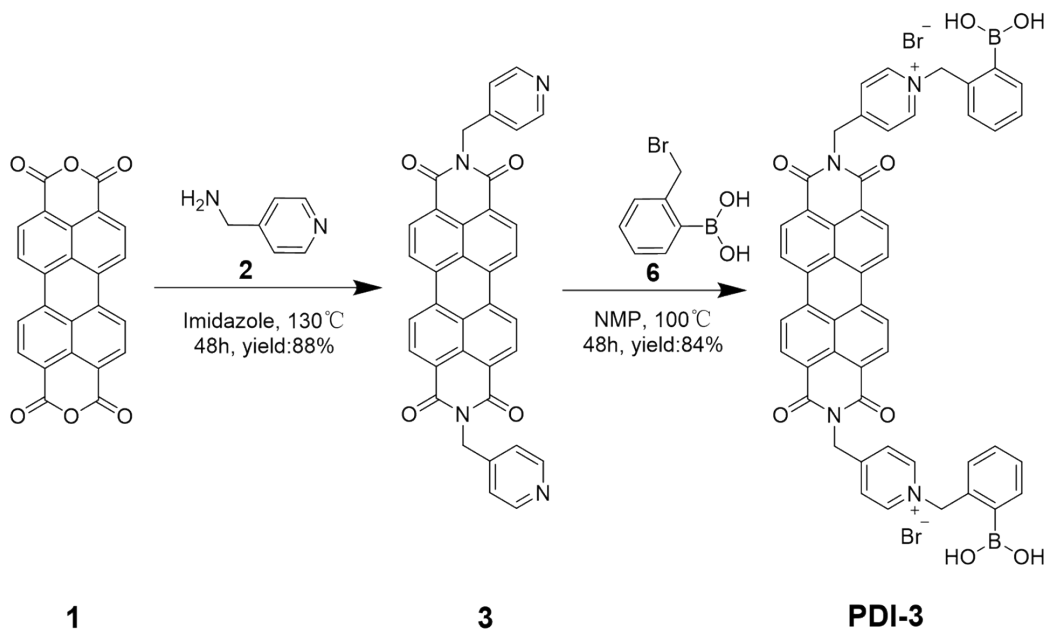

Fig. S4 Synthetic routes of PDI-3.

#### 4. $^1\text{H}$ NMR Spectrum of PDIs

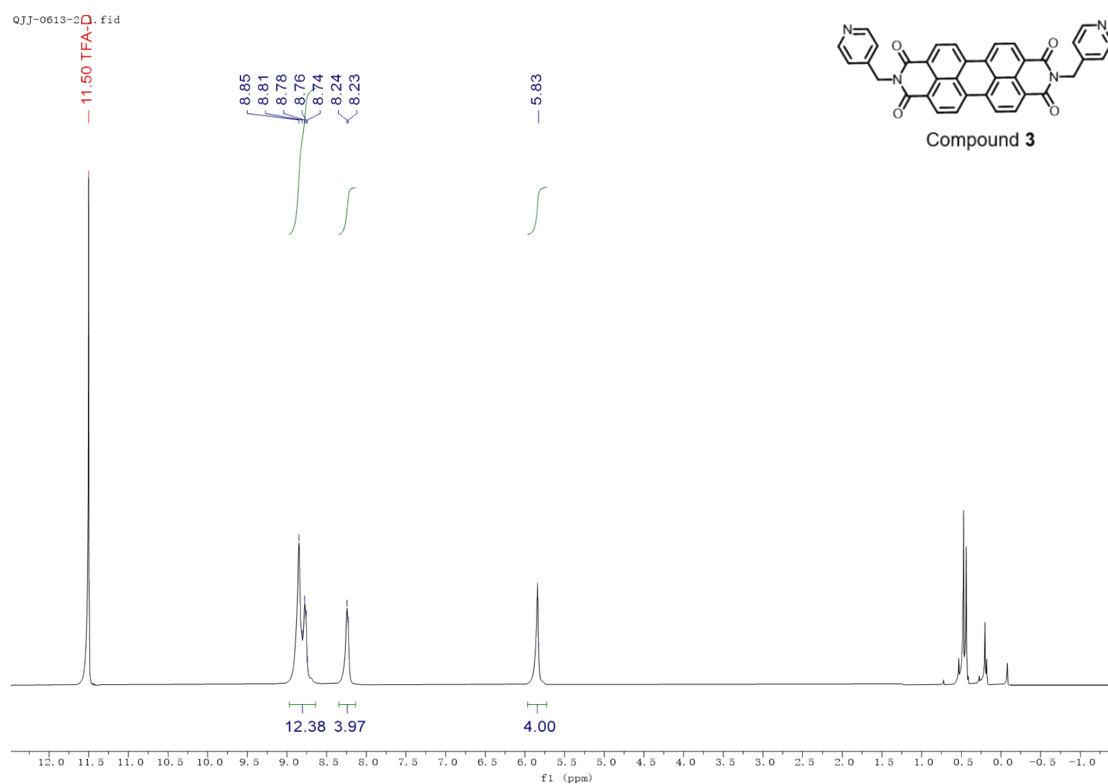

Fig. S5  $^1\text{H}$  NMR spectrum of compound 3 in  $\text{CF}_3\text{COOD}$  (300 MHz). The nuclear magnetic peak near 0.5ppm is the residual solvent peak in  $\text{CF}_3\text{COOD}$ .

QJJ-PDI-4PBA-pl. 1. fid

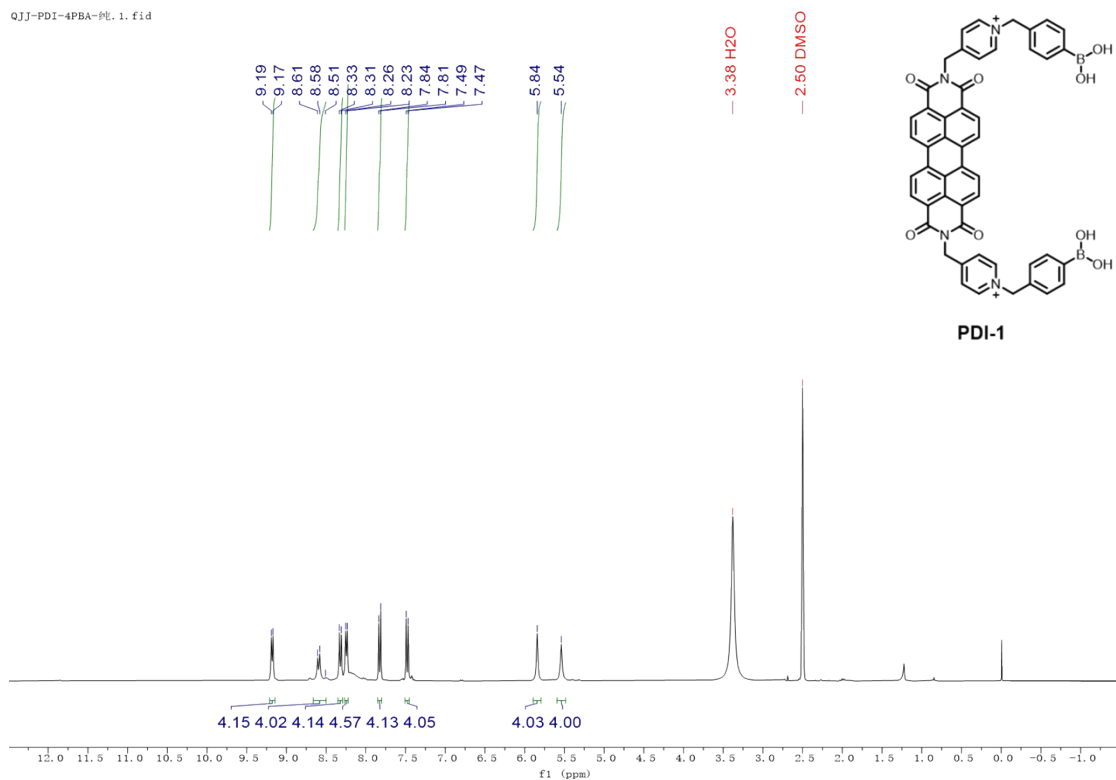

**Fig. S6** <sup>1</sup>H NMR spectrum of PDI-1 in DMSO-*d*<sub>6</sub> (300 MHz).

QJJ-PDI-3PBA. 1. fid

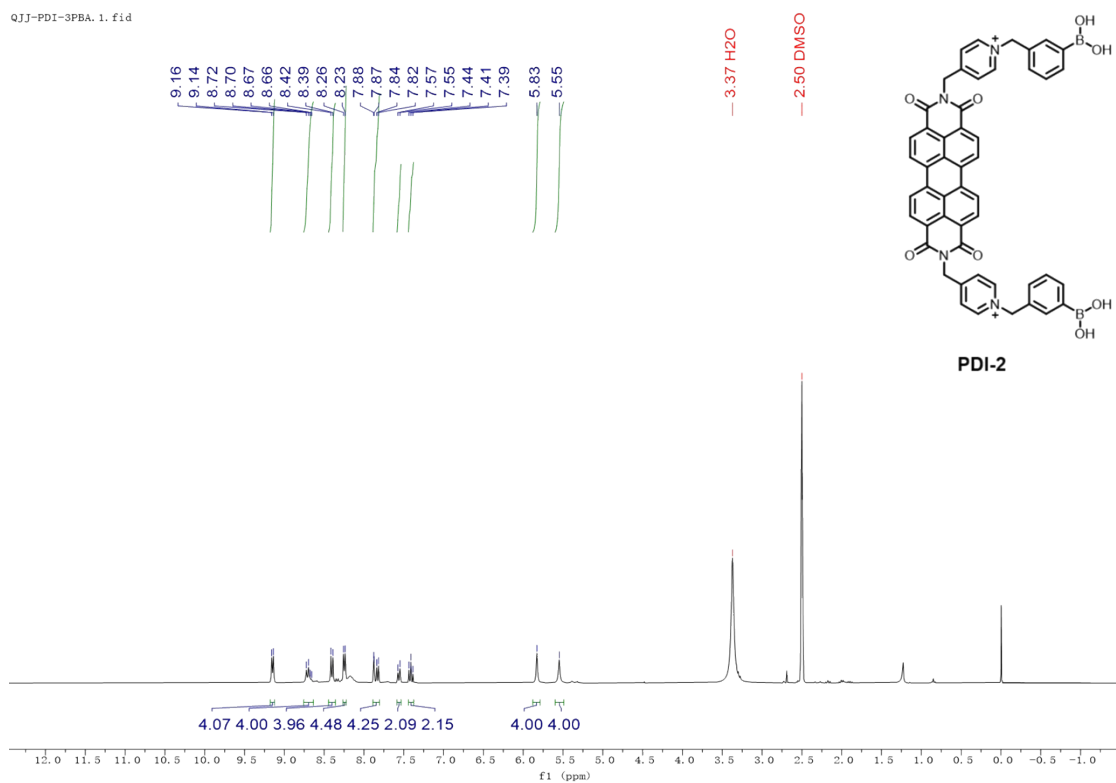

**Fig. S7** <sup>1</sup>H NMR spectrum of PDI-2 in DMSO-*d*<sub>6</sub> (300 MHz).

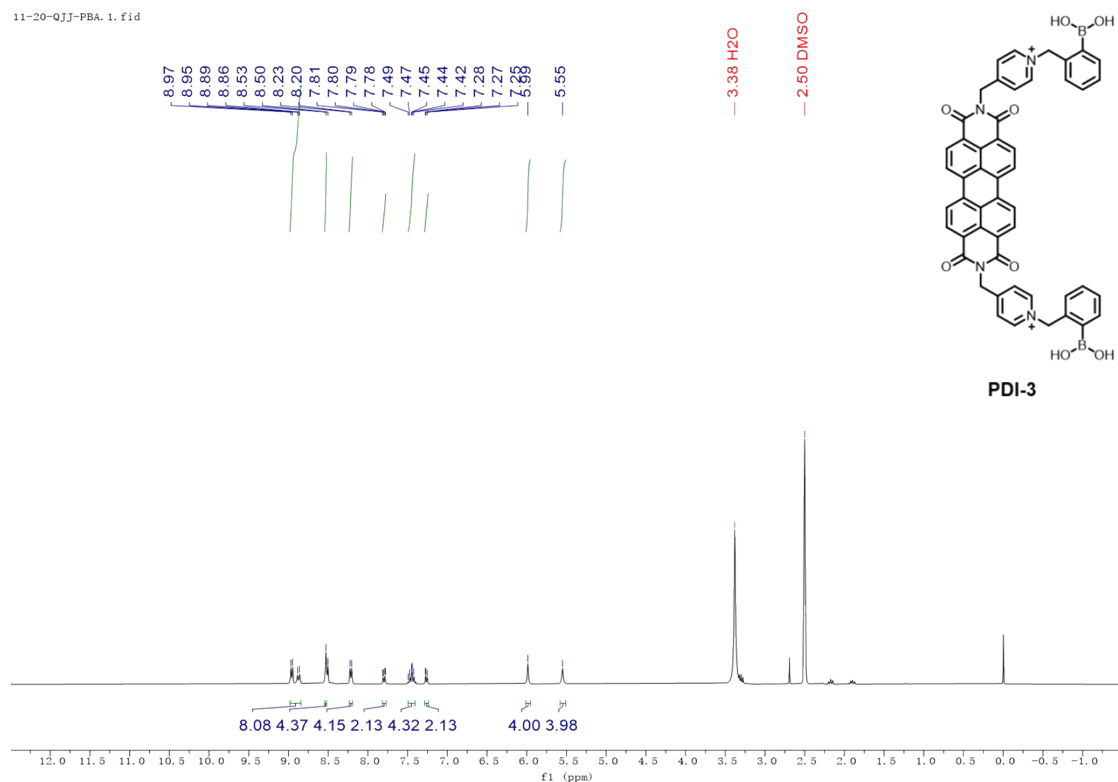

Fig. S8  $^1\text{H}$  NMR spectrum of PDI-3 in  $\text{DMSO-}d_6$  (300 MHz).

### 5. $^{13}\text{C}$ NMR Spectrum of PDIs

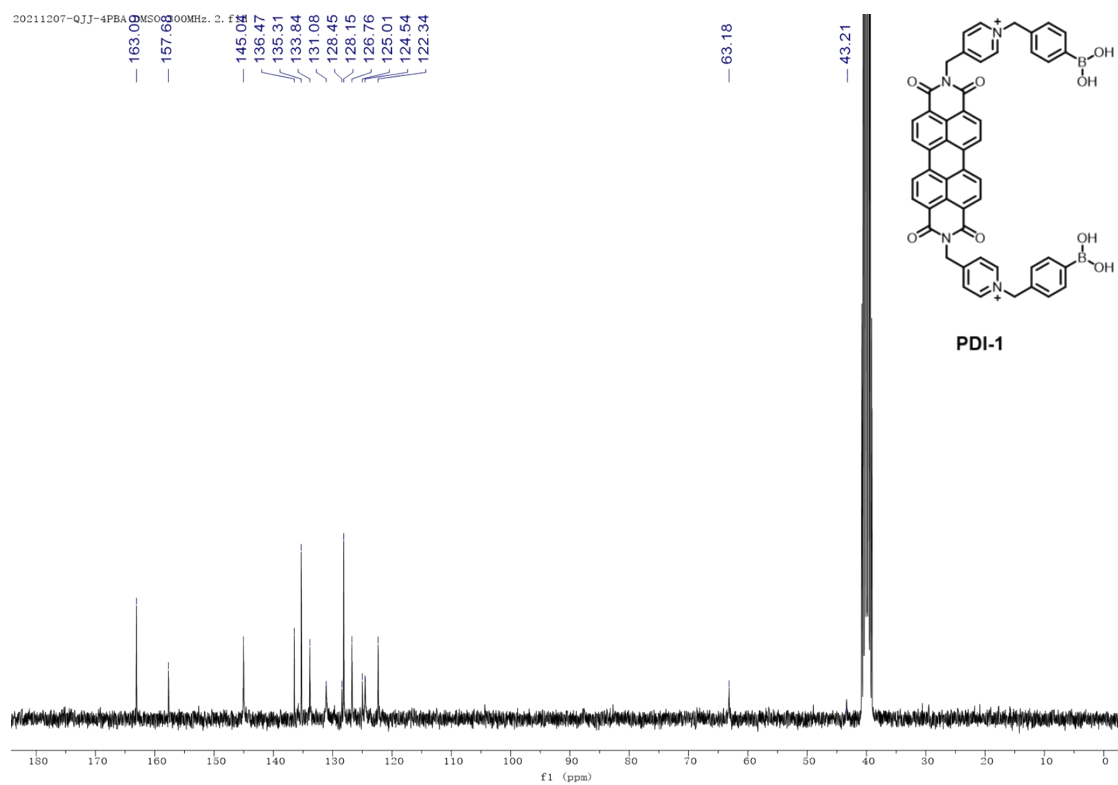

Fig. S9  $^{13}\text{C}$  NMR spectrum of PDI-1 in  $\text{DMSO-}d_6$  (75 MHz).

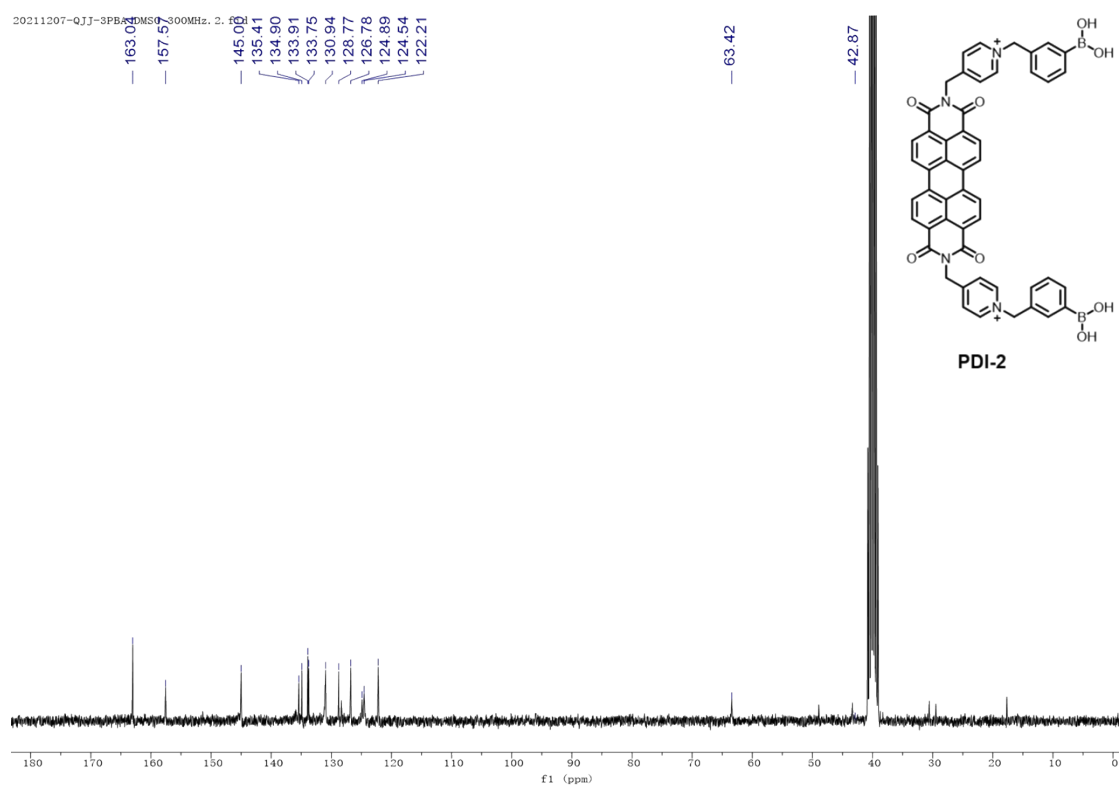

**Fig. S10**  $^{13}\text{C}$  NMR spectrum of PDI-2 in  $\text{DMSO-}d_6$  (75 MHz).

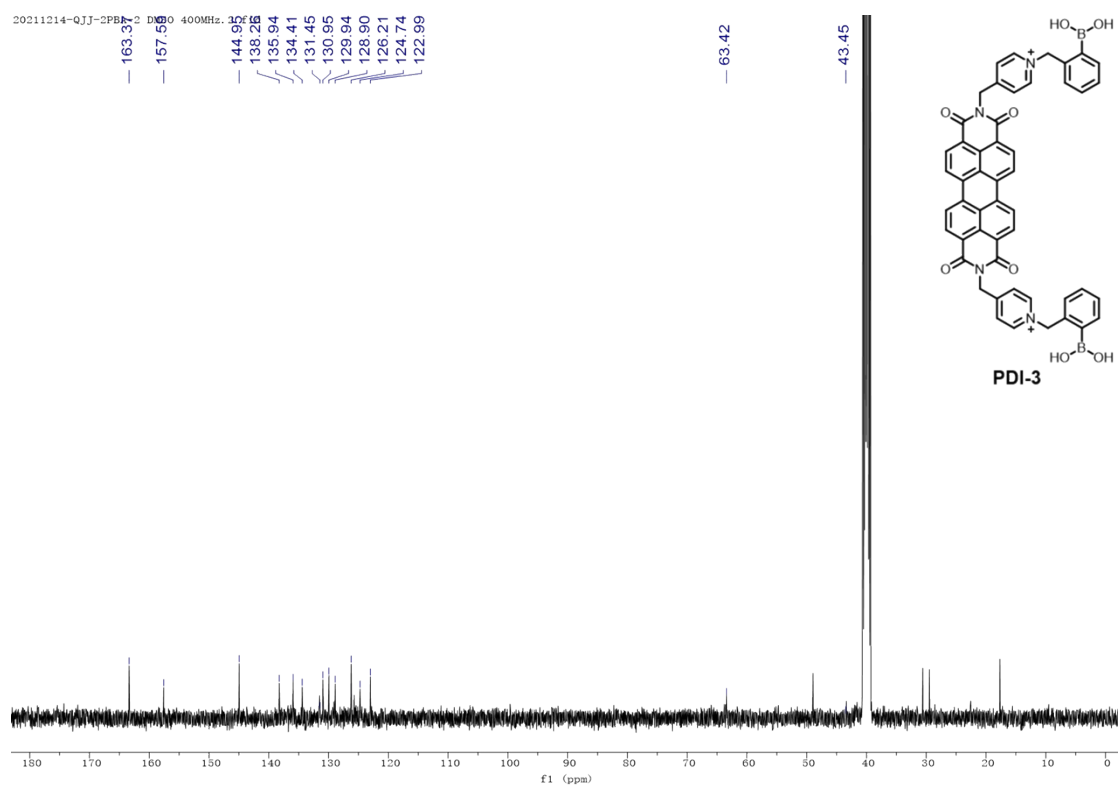

**Fig. S11**  $^{13}\text{C}$  NMR spectrum of PDI-3 in  $\text{DMSO-}d_6$  (100 MHz).

## 6. MS Data for PDIs

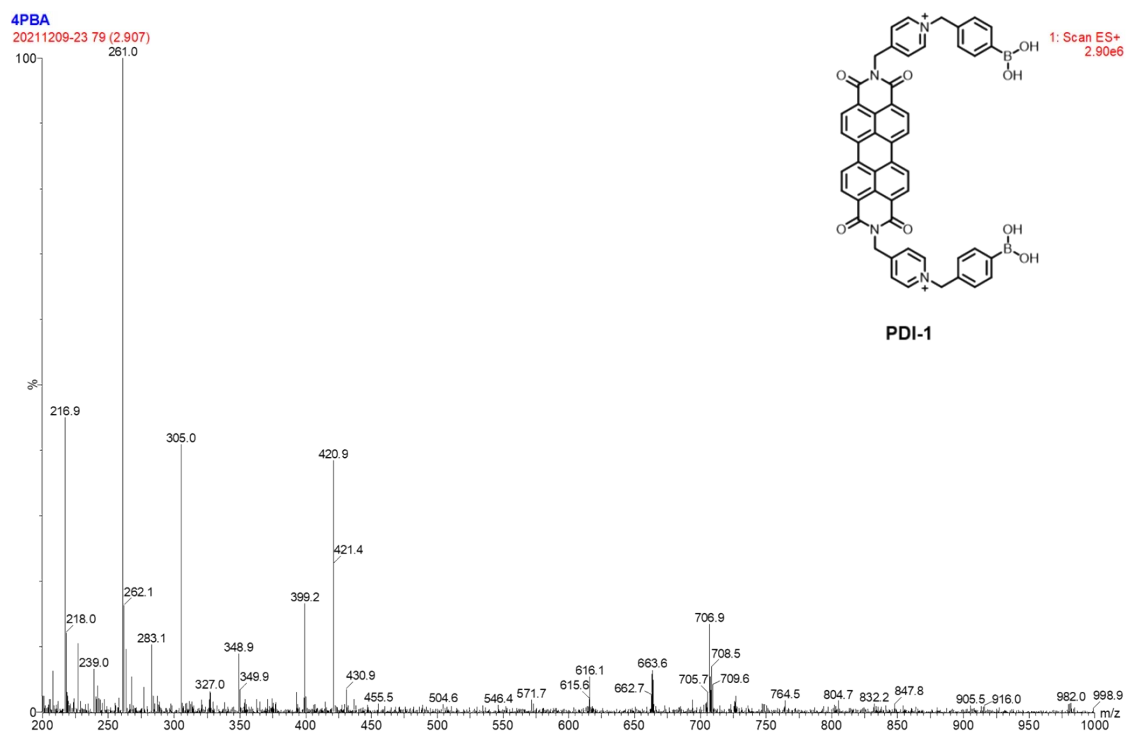

Fig. S12 MS Data for PDI-1.

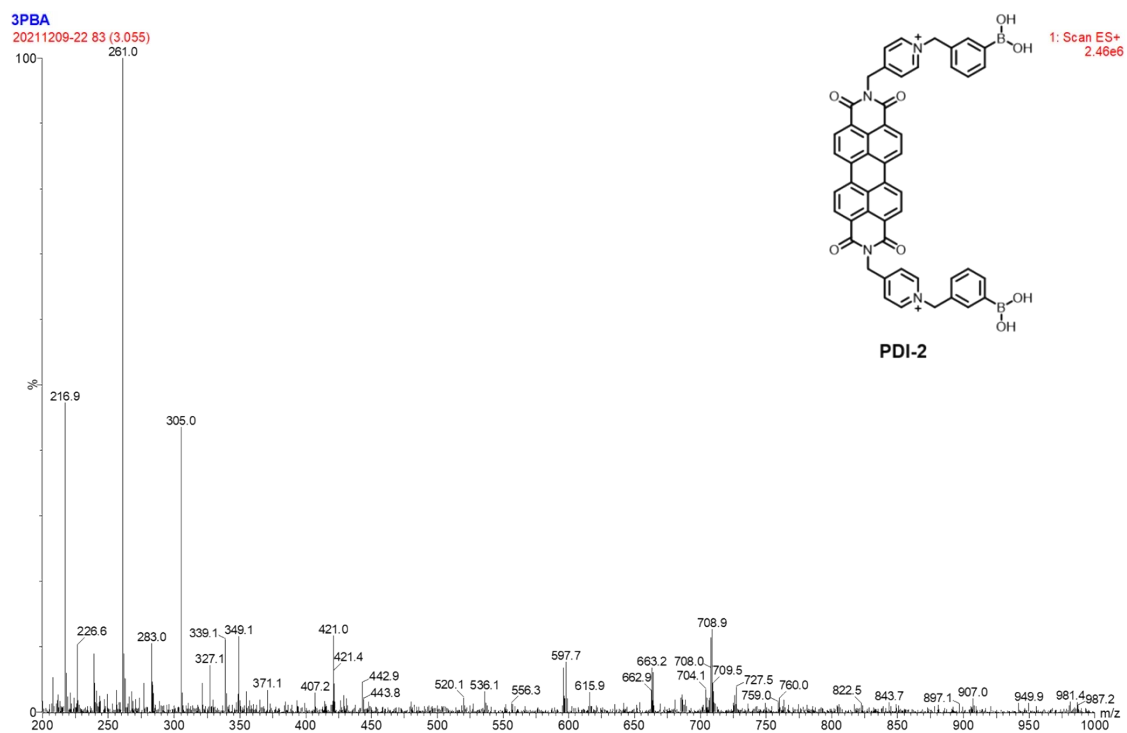

Fig. S13 MS Data for PDI-2.



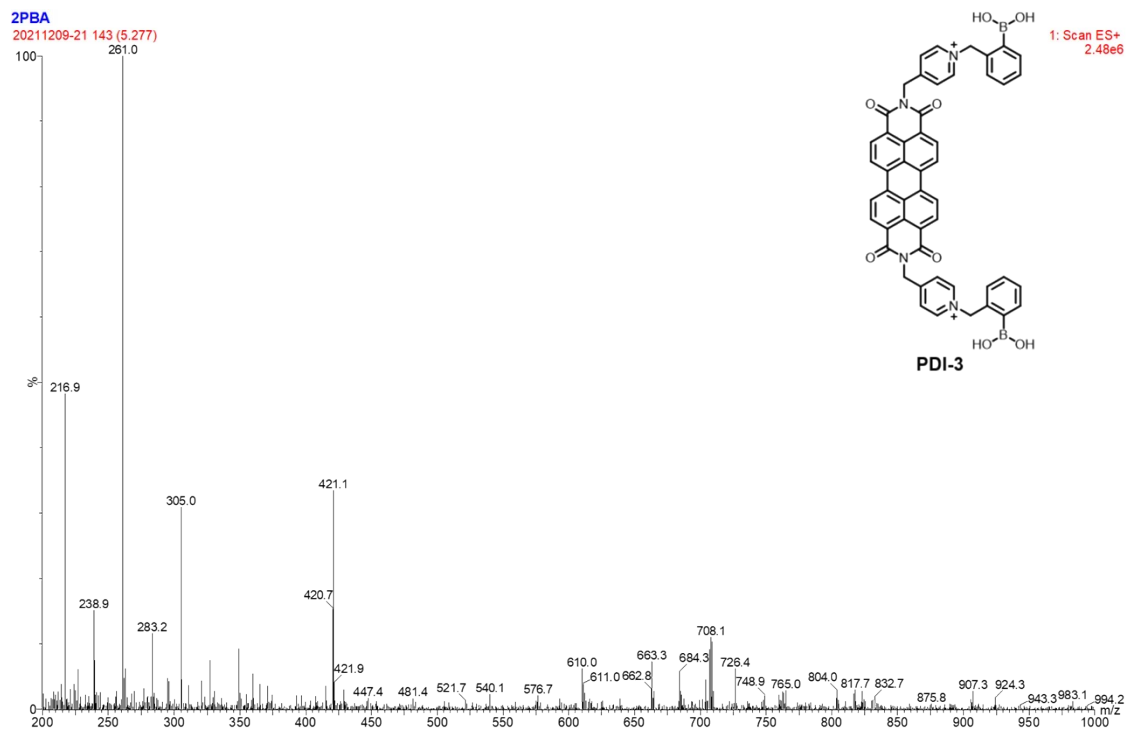

**Fig. S14** MS Data for PDI-3.

## 7. Absorption and fluorescence spectra

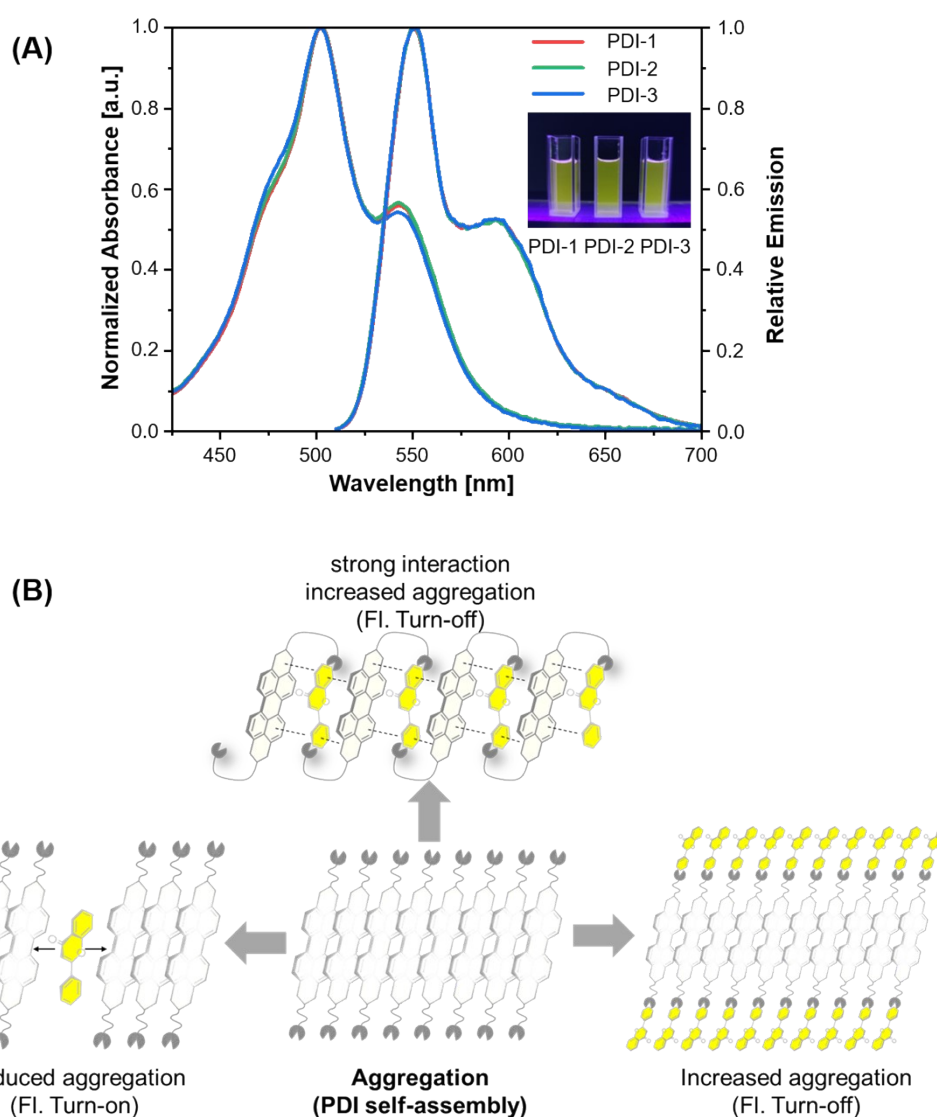

**Fig. S15** (A) Normalized absorption and fluorescence spectra of the sensing array in aqueous solution, (B) Putative PDI assembly pattern with flavonoids.

### 8. Fluorescence changes for PDIs against tangeretin and hesperidin in different concentrations

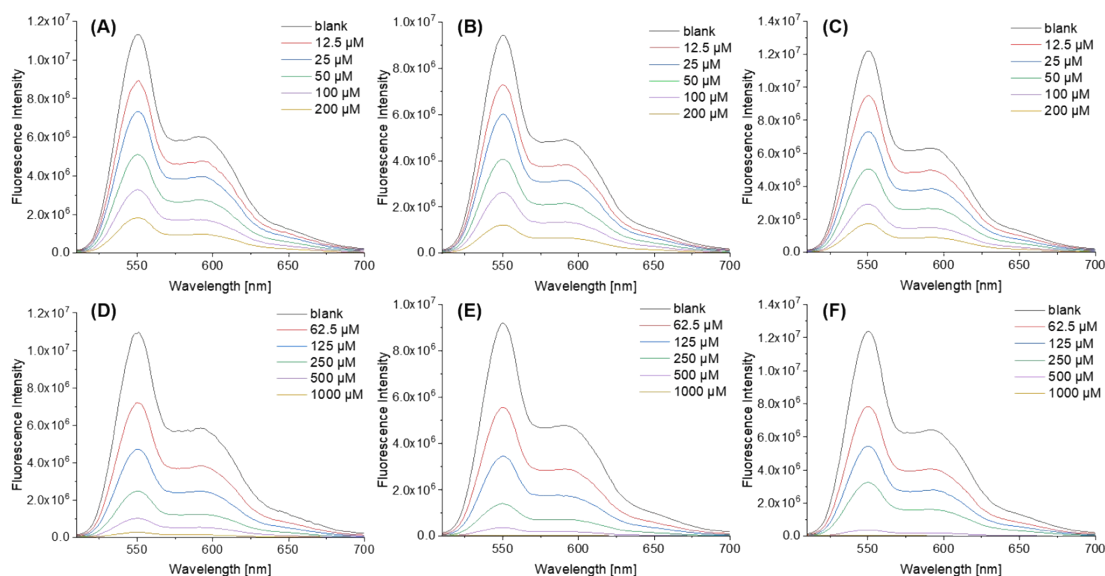

**Fig. S16** Fluorescence change of PDIs (10  $\mu\text{M}$ , aqueous solution) after adding tangeretin hesperidin in different concentrations, PDI-1-Tangeretin. (A) PDI-2- Tangeretin, (B) PDI-3- Tangeretin, (C) PDI-1-Hesperidin, (D) PDI-2- Hesperidin, (E) PDI-3- Hesperidin, (F) The fluorescence value changes were recorded on a SpectraMaxR ID3 Multi-Mode Microplate Reader (Molecular Devices, California, USA) at room temperature, ( $\lambda_{\text{ex}} = 470 \text{ nm}$ ,  $\lambda_{\text{em}} = 550 \text{ nm}$ ).

### 9. Discrimination of the flavonoids in carbohydrates and carboxylic acids

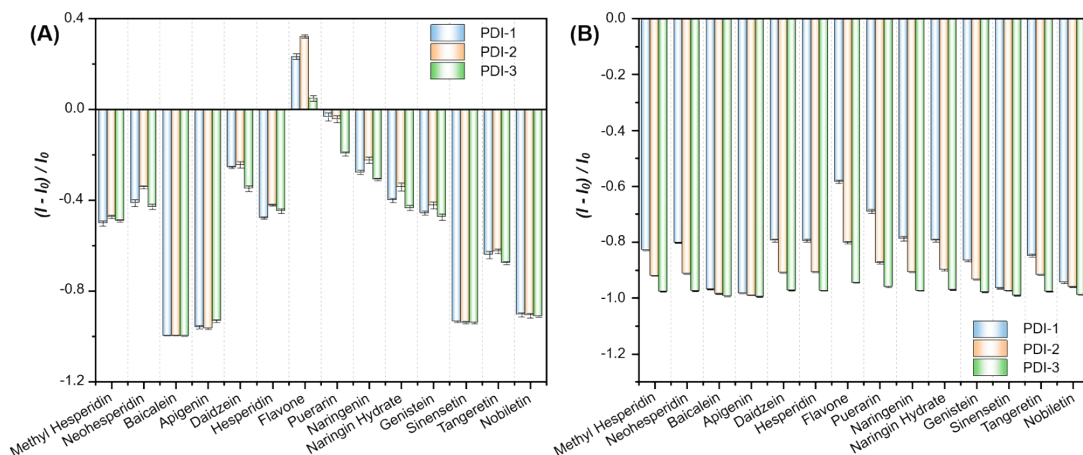

**Fig. S17** Fluorescence response pattern ( $(I - I_0)/I_0$ ) obtained by PDIs (10  $\mu\text{M}$ , aqueous solution) treated with flavonoids in carbohydrates (A) and natural acid (B). Each value is the average of six independent measurements; each error bar shows the standard error (SE) of these measurements.

## 10. Wine sample analysis

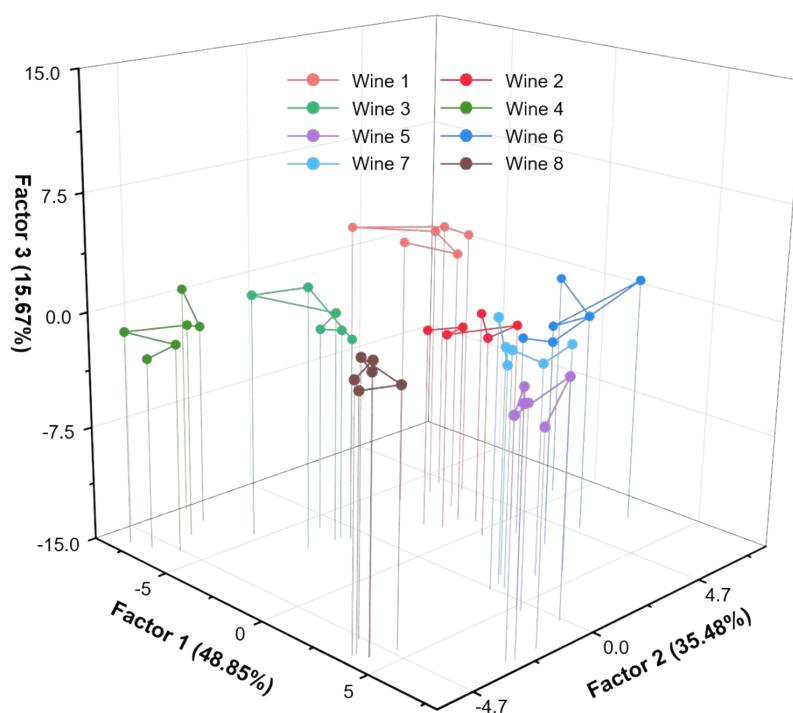

**Fig. S18** 3D canonical score plot of simplified fluorescence-response patterns obtained with an array of the PDIs (10  $\mu$ M, aqueous solution). Each point represents the response pattern for a single wine to the array.

## 11. Fluorescence Response Pattern ( $I-I_0$ )/ $I_0$ and Linear Discriminant Analysis

The flavonoids were dissolved in DMSO and mixed into a 1mM solution. To the constructed new fluorescent array sensor, 10  $\mu$ L of different flavonoids were added. The final concentration of flavonoids was 50  $\mu$ M, the 96-well plate was placed in a microplate reader and shaken for 10 seconds, and each group of flavonoids was tested repeatedly six times, and the fluorescence intensity data were recorded. **For convenience of record, abbreviations in the table refer to Methyl Hesperidin (MH), Neohesperidin (Neo), Baicalein (Bai), Apigenin (Api), Daidzein (Dai), Hesperidin (Hes), Flavone (Fla), Puerarin (Pue), Naringenin (Nar), Naringin hydrate (NH), Genistein (Gen), Sinensetin (Sin), Tangeretin (Tan), Nobiletin (Nob).**

**Table S1** Data matrix for the fluorescence response of the array sensor to different flavonoids (the concentration of 14 flavonoids was 50  $\mu$ M).

| $\Delta I/I_0$ | PDI-1    | PDI-2    | PDI-3    | Factor 1 | Factor 2 | Factor 3 |
|----------------|----------|----------|----------|----------|----------|----------|
| MH             | -0.45748 | -0.45975 | -0.45734 | 9.80468  | -2.83683 | 3.35062  |

|     |          |          |          |           |           |          |
|-----|----------|----------|----------|-----------|-----------|----------|
| MH  | -0.45447 | -0.47836 | -0.46935 | 8.99230   | -2.32981  | 5.35348  |
| MH  | -0.45496 | -0.47748 | -0.47679 | 8.53588   | -1.68611  | 5.15975  |
| MH  | -0.45721 | -0.46713 | -0.47925 | 8.41585   | -1.21493  | 3.91567  |
| MH  | -0.45950 | -0.47181 | -0.48643 | 7.85048   | -0.87022  | 4.08842  |
| MH  | -0.46541 | -0.47947 | -0.49059 | 7.30478   | -1.05508  | 4.22126  |
| Neo | -0.35116 | -0.30017 | -0.49528 | 13.05381  | 10.87193  | -2.06758 |
| Neo | -0.36240 | -0.28909 | -0.50455 | 12.20680  | 11.54011  | -4.31534 |
| Neo | -0.36261 | -0.30463 | -0.51100 | 11.64587  | 11.53428  | -2.87919 |
| Neo | -0.36850 | -0.32408 | -0.51629 | 10.90741  | 11.03182  | -1.60950 |
| Neo | -0.41150 | -0.33753 | -0.52113 | 8.91886   | 9.00958   | -4.54017 |
| Neo | -0.39175 | -0.33369 | -0.51755 | 9.88891   | 9.74084   | -2.95594 |
| Bai | -0.99877 | -0.99879 | -0.99908 | -48.12919 | -0.27657  | -1.55498 |
| Bai | -0.99883 | -0.99888 | -0.99908 | -48.13253 | -0.28194  | -1.55233 |
| Bai | -0.99881 | -0.99880 | -0.99908 | -48.13074 | -0.27871  | -1.55814 |
| Bai | -0.99878 | -0.99886 | -0.99913 | -48.13333 | -0.27500  | -1.54892 |
| Bai | -0.99881 | -0.99883 | -0.99909 | -48.13144 | -0.27852  | -1.55435 |
| Bai | -0.99886 | -0.99890 | -0.99913 | -48.13697 | -0.27993  | -1.55353 |
| Api | -0.97581 | -0.97522 | -0.98857 | -46.41558 | 0.70410   | -1.51531 |
| Api | -0.97469 | -0.97559 | -0.98825 | -46.35988 | 0.71497   | -1.36845 |
| Api | -0.97654 | -0.97607 | -0.98880 | -46.46510 | 0.66066   | -1.50615 |
| Api | -0.97615 | -0.97602 | -0.98935 | -46.48328 | 0.72707   | -1.47768 |
| Api | -0.97780 | -0.97459 | -0.98927 | -46.52302 | 0.69498   | -1.77684 |
| Api | -0.97629 | -0.97711 | -0.98900 | -46.47872 | 0.65190   | -1.38222 |
| Dai | -0.33963 | -0.26877 | -0.33290 | 23.58971  | -1.35483  | -2.67512 |
| Dai | -0.36141 | -0.28186 | -0.34849 | 21.72399  | -1.47933  | -3.65807 |
| Dai | -0.36250 | -0.28929 | -0.35674 | 21.10838  | -1.08647  | -3.11045 |
| Dai | -0.36402 | -0.28855 | -0.36142 | 20.77961  | -0.73061  | -3.36851 |
| Dai | -0.36581 | -0.30359 | -0.36039 | 20.61733  | -1.42968  | -2.07397 |
| Dai | -0.35823 | -0.29457 | -0.36027 | 20.99463  | -0.77646  | -2.20830 |
| Hes | -0.49696 | -0.47786 | -0.43937 | 9.26792   | -6.80871  | 1.39976  |
| Hes | -0.49476 | -0.48246 | -0.42946 | 9.89583   | -7.71650  | 2.14004  |
| Hes | -0.49905 | -0.48097 | -0.43719 | 9.29109   | -7.20038  | 1.51442  |
| Hes | -0.49474 | -0.47484 | -0.44093 | 9.28600   | -6.46828  | 1.31007  |
| Hes | -0.48932 | -0.50463 | -0.44512 | 8.91402   | -6.91299  | 4.69677  |
| Hes | -0.48817 | -0.49464 | -0.44141 | 9.28501   | -6.82496  | 3.86961  |
| Fla | 0.12925  | 0.25585  | 0.19442  | 77.88350  | -6.49540  | -3.55726 |
| Fla | 0.13523  | 0.23429  | 0.21366  | 79.03054  | -8.62406  | -0.72577 |
| Fla | 0.12792  | 0.22501  | 0.21200  | 78.56755  | -9.14265  | -0.55203 |
| Fla | 0.12424  | 0.23027  | 0.21277  | 78.53730  | -9.19138  | -1.41531 |
| Fla | 0.11496  | 0.22574  | 0.23869  | 79.71571  | -11.98622 | -1.67207 |
| Fla | 0.11801  | 0.25596  | 0.20171  | 77.91765  | -7.62667  | -4.60633 |
| Pue | -0.06380 | -0.01714 | -0.29849 | 38.30413  | 17.15279  | 0.10702  |
| Pue | -0.06294 | -0.00928 | -0.31697 | 37.30502  | 19.04552  | -0.72225 |
| Pue | -0.08354 | -0.00964 | -0.31274 | 36.81116  | 17.73248  | -2.66422 |

|     |          |          |          |           |          |          |
|-----|----------|----------|----------|-----------|----------|----------|
| Pue | -0.09761 | -0.05474 | -0.33312 | 34.59603  | 17.24213 | 0.17522  |
| Pue | -0.14013 | -0.09359 | -0.34028 | 32.21556  | 14.54481 | -0.26273 |
| Pue | -0.12722 | -0.07256 | -0.32476 | 33.84052  | 14.55044 | -0.91843 |
| Nar | -0.38163 | -0.33342 | -0.33087 | 21.50790  | -5.72116 | -0.48511 |
| Nar | -0.39863 | -0.33076 | -0.34648 | 19.98070  | -5.07018 | -2.52839 |
| Nar | -0.40121 | -0.32924 | -0.36546 | 18.75995  | -3.51448 | -3.08140 |
| Nar | -0.36430 | -0.34004 | -0.37552 | 19.37413  | -1.35342 | 1.48975  |
| Nar | -0.38520 | -0.32648 | -0.38365 | 18.27182  | -1.13544 | -1.93349 |
| Nar | -0.37224 | -0.33433 | -0.37392 | 19.24322  | -1.65063 | 0.17273  |
| NH  | -0.41247 | -0.43412 | -0.54302 | 6.54037   | 7.43191  | 4.56379  |
| NH  | -0.41545 | -0.45955 | -0.54662 | 5.94598   | 6.70724  | 6.71191  |
| NH  | -0.41598 | -0.45577 | -0.55502 | 5.46096   | 7.53349  | 6.22528  |
| NH  | -0.43408 | -0.47124 | -0.55276 | 4.77859   | 5.96962  | 5.97784  |
| NH  | -0.41506 | -0.47469 | -0.56462 | 4.71483   | 7.72825  | 8.07370  |
| NH  | -0.42042 | -0.47948 | -0.55023 | 5.33795   | 6.08665  | 8.13318  |
| Gen | -0.62702 | -0.58596 | -0.53893 | -2.58023  | -8.05208 | -1.61177 |
| Gen | -0.62652 | -0.59189 | -0.54957 | -3.26647  | -7.32914 | -1.07260 |
| Gen | -0.62544 | -0.60263 | -0.55223 | -3.50145  | -7.43192 | 0.05350  |
| Gen | -0.63753 | -0.60816 | -0.56281 | -4.63503  | -7.27506 | -0.67570 |
| Gen | -0.63557 | -0.60632 | -0.56243 | -4.52132  | -7.15328 | -0.65985 |
| Gen | -0.63055 | -0.60176 | -0.54763 | -3.39995  | -8.02629 | -0.49255 |
| Sin | -0.95427 | -0.95341 | -0.95234 | -43.22194 | -0.63731 | -1.23684 |
| Sin | -0.95475 | -0.95381 | -0.95385 | -43.33476 | -0.54479 | -1.25766 |
| Sin | -0.95154 | -0.95571 | -0.95552 | -43.33960 | -0.32263 | -0.77356 |
| Sin | -0.95583 | -0.95366 | -0.95238 | -43.28354 | -0.71436 | -1.36567 |
| Sin | -0.95414 | -0.95475 | -0.95593 | -43.44850 | -0.37204 | -1.12395 |
| Sin | -0.95258 | -0.95574 | -0.95468 | -43.32702 | -0.44231 | -0.86519 |
| Tan | -0.64479 | -0.64641 | -0.61724 | -8.58326  | -4.30754 | 1.88854  |
| Tan | -0.64868 | -0.64898 | -0.61744 | -8.76301  | -4.55940 | 1.75652  |
| Tan | -0.65355 | -0.65275 | -0.62606 | -9.49885  | -4.17760 | 1.57757  |
| Tan | -0.65787 | -0.67001 | -0.63777 | -10.54358 | -3.98327 | 2.73643  |
| Tan | -0.64959 | -0.66667 | -0.64496 | -10.64228 | -2.87436 | 3.16177  |
| Tan | -0.66094 | -0.66466 | -0.65039 | -11.35835 | -2.85802 | 1.81435  |
| Nob | -0.90895 | -0.90667 | -0.90164 | -38.03255 | -1.25111 | -0.93913 |
| Nob | -0.91010 | -0.90449 | -0.90145 | -38.03940 | -1.24313 | -1.26136 |
| Nob | -0.90948 | -0.90617 | -0.90154 | -38.04036 | -1.26615 | -1.03840 |
| Nob | -0.90601 | -0.90577 | -0.90099 | -37.87759 | -1.14097 | -0.73488 |
| Nob | -0.90462 | -0.90614 | -0.90199 | -37.89187 | -1.00461 | -0.57129 |
| Nob | -0.90747 | -0.90475 | -0.90680 | -38.26952 | -0.67563 | -1.02275 |

**Table S2** Canonical scores of group means.

|            | <b>Factor 1</b> | <b>Factor 2</b> | <b>Factor 3</b> |
|------------|-----------------|-----------------|-----------------|
| <b>Api</b> | -46.454         | 0.692           | -1.504          |

|            |         |        |        |
|------------|---------|--------|--------|
| <b>Bai</b> | -48.132 | -0.278 | -1.554 |
| <b>Dai</b> | 21.469  | -1.143 | -2.849 |
| <b>Fla</b> | 78.609  | -8.844 | -2.088 |
| <b>Gen</b> | -3.651  | -7.545 | -0.743 |
| <b>Hes</b> | 9.323   | -6.989 | 2.488  |
| <b>MH</b>  | 8.484   | -1.665 | 4.348  |
| <b>NH</b>  | 5.463   | 6.91   | 6.614  |
| <b>Nar</b> | 19.523  | -3.074 | -1.061 |
| <b>Neo</b> | 11.104  | 10.621 | -3.061 |
| <b>Nob</b> | -38.025 | -1.097 | -0.928 |
| <b>Pue</b> | 35.512  | 16.711 | -0.714 |
| <b>Sin</b> | -43.326 | -0.506 | -1.104 |
| <b>Tan</b> | -9.898  | -3.793 | 2.156  |

**Table S3** Jackknifed classification matrix.

Jackknifed classification matrix showed the 100% correct classification.

|              | Api | Bai | Dai | Fla | Gen | Hes | MH | NH | Nar | Neo | Nob | Pue | Sin | Tan | %correct   |
|--------------|-----|-----|-----|-----|-----|-----|----|----|-----|-----|-----|-----|-----|-----|------------|
| Api          | 6   | 0   | 0   | 0   | 0   | 0   | 0  | 0  | 0   | 0   | 0   | 0   | 0   | 0   | 100        |
| Bai          | 0   | 6   | 0   | 0   | 0   | 0   | 0  | 0  | 0   | 0   | 0   | 0   | 0   | 0   | 100        |
| Dai          | 0   | 0   | 6   | 0   | 0   | 0   | 0  | 0  | 0   | 0   | 0   | 0   | 0   | 0   | 100        |
| Fla          | 0   | 0   | 0   | 6   | 0   | 0   | 0  | 0  | 0   | 0   | 0   | 0   | 0   | 0   | 100        |
| Gen          | 0   | 0   | 0   | 0   | 6   | 0   | 0  | 0  | 0   | 0   | 0   | 0   | 0   | 0   | 100        |
| Hes          | 0   | 0   | 0   | 0   | 0   | 6   | 0  | 0  | 0   | 0   | 0   | 0   | 0   | 0   | 100        |
| MH           | 0   | 0   | 0   | 0   | 0   | 0   | 6  | 0  | 0   | 0   | 0   | 0   | 0   | 0   | 100        |
| NH           | 0   | 0   | 0   | 0   | 0   | 0   | 0  | 6  | 0   | 0   | 0   | 0   | 0   | 0   | 100        |
| Nar          | 0   | 0   | 0   | 0   | 0   | 0   | 0  | 0  | 6   | 0   | 0   | 0   | 0   | 0   | 100        |
| Neo          | 0   | 0   | 0   | 0   | 0   | 0   | 0  | 0  | 0   | 6   | 0   | 0   | 0   | 0   | 100        |
| Nob          | 0   | 0   | 0   | 0   | 0   | 0   | 0  | 0  | 0   | 0   | 6   | 0   | 0   | 0   | 100        |
| Pue          | 0   | 0   | 0   | 0   | 0   | 0   | 0  | 0  | 0   | 0   | 0   | 6   | 0   | 0   | 100        |
| Sin          | 0   | 0   | 0   | 0   | 0   | 0   | 0  | 0  | 0   | 0   | 0   | 0   | 6   | 0   | 100        |
| Tan          | 0   | 0   | 0   | 0   | 0   | 0   | 0  | 0  | 0   | 0   | 0   | 0   | 0   | 6   | 100        |
| <b>Total</b> | 6   | 6   | 6   | 6   | 6   | 6   | 6  | 6  | 6   | 6   | 6   | 6   | 6   | 6   | <b>100</b> |

**Table S4** Data matrix for the fluorescence response of the array sensor to unknown samples.

| Fluorescence Response Pattern |          |          | Results LDA |          |          |       | Analyte        |              |  |
|-------------------------------|----------|----------|-------------|----------|----------|-------|----------------|--------------|--|
| PDI-1                         | PDI-2    | PDI-3    | Factor1     | Factor2  | Factor3  | Group | Identification | Verification |  |
| -0.44529                      | -0.46514 | -0.48332 | 8.62267     | -0.25278 | 4.85356  | 7     | MH             | MH           |  |
| -0.43956                      | -0.45379 | -0.48130 | 9.07173     | 0.23621  | 4.32804  | 7     | MH             | MH           |  |
| -0.44673                      | -0.45217 | -0.48065 | 8.86904     | -0.08957 | 3.47611  | 7     | MH             | MH           |  |
| -0.44119                      | -0.47648 | -0.47241 | 9.30778     | -1.39650 | 6.44257  | 7     | MH             | MH           |  |
| -0.36680                      | -0.31865 | -0.51663 | 11.00654    | 11.32957 | -1.97258 | 10    | Neo            | Neo          |  |

|          |          |          |           |           |          |    |     |     |
|----------|----------|----------|-----------|-----------|----------|----|-----|-----|
| -0.36505 | -0.30658 | -0.50938 | 11.63408  | 11.21604  | -2.91563 | 10 | Neo | Neo |
| -0.36615 | -0.29882 | -0.51837 | 11.13531  | 12.20603  | -3.84801 | 10 | Neo | Neo |
| -0.35723 | -0.30965 | -0.50455 | 12.17570  | 11.05240  | -1.81469 | 10 | Neo | Neo |
| -0.99878 | -0.99882 | -0.99908 | -48.13020 | -0.27745  | -1.55358 | 2  | Bai | Bai |
| -0.99885 | -0.99879 | -0.99911 | -48.13378 | -0.27746  | -1.56327 | 2  | Bai | Bai |
| -0.99882 | -0.99885 | -0.99909 | -48.13233 | -0.27922  | -1.55362 | 2  | Bai | Bai |
| -0.99883 | -0.99889 | -0.99907 | -48.13148 | -0.28379  | -1.55093 | 2  | Bai | Bai |
| -0.97707 | -0.97675 | -0.98888 | -46.49602 | 0.61912   | -1.49289 | 1  | Api | Api |
| -0.97746 | -0.97536 | -0.98894 | -46.49947 | 0.65562   | -1.66626 | 1  | Api | Api |
| -0.97541 | -0.97421 | -0.98927 | -46.43287 | 0.81809   | -1.58062 | 1  | Api | Api |
| -0.97581 | -0.97427 | -0.99008 | -46.49652 | 0.86612   | -1.62037 | 1  | Api | Api |
| -0.35608 | -0.28713 | -0.35330 | 21.57097  | -1.01156  | -2.66514 | 3  | Dai | Dai |
| -0.35808 | -0.29077 | -0.33955 | 22.28865  | -2.40395  | -2.39562 | 3  | Dai | Dai |
| -0.34716 | -0.28488 | -0.34493 | 22.42163  | -1.23960  | -1.94433 | 3  | Dai | Dai |
| -0.36079 | -0.27753 | -0.34705 | 21.87868  | -1.42126  | -4.00628 | 3  | Dai | Dai |
| -0.49803 | -0.48577 | -0.44052 | 9.07613   | -7.03858  | 2.05272  | 6  | Hes | Hes |
| -0.47981 | -0.50697 | -0.43227 | 10.00705  | -7.65808  | 5.95679  | 6  | Hes | Hes |
| -0.48068 | -0.46953 | -0.42363 | 10.89326  | -7.11634  | 2.30730  | 6  | Hes | Hes |
| -0.48481 | -0.48402 | -0.42549 | 10.47860  | -7.65644  | 3.29502  | 6  | Hes | Hes |
| 0.11930  | 0.25496  | 0.21083  | 78.50323  | -8.38118  | -4.31051 | 4  | Fla | Fla |
| 0.14298  | 0.25364  | 0.23227  | 80.63758  | -9.17703  | -1.69641 | 4  | Fla | Fla |
| 0.14788  | 0.22485  | 0.25995  | 82.17744  | -12.32986 | 1.80089  | 4  | Fla | Fla |
| 0.13119  | 0.24920  | 0.23340  | 80.23221  | -9.96846  | -2.40749 | 4  | Fla | Fla |
| -0.08930 | -0.02680 | -0.32785 | 35.51070  | 18.15489  | -1.68279 | 12 | Pue | Pue |
| -0.11107 | -0.03443 | -0.31695 | 35.29970  | 15.96304  | -2.97947 | 12 | Pue | Pue |
| -0.09836 | -0.00683 | -0.31921 | 35.91506  | 17.70829  | -4.43648 | 12 | Pue | Pue |
| -0.09111 | -0.02798 | -0.30910 | 36.56240  | 16.43028  | -1.59359 | 12 | Pue | Pue |
| -0.38171 | -0.33565 | -0.38176 | 18.41481  | -1.46041  | -0.68820 | 9  | Nar | Nar |
| -0.39395 | -0.29147 | -0.37671 | 18.74462  | -0.89289  | -6.12976 | 3  | Nar | Dai |
| -0.35534 | -0.29856 | -0.37944 | 19.90111  | 0.85057   | -1.69459 | 3  | Nar | Dai |
| -0.36588 | -0.31384 | -0.35614 | 20.76222  | -2.15571  | -1.05169 | 9  | Nar | Nar |
| -0.41938 | -0.47191 | -0.54943 | 5.50391   | 6.33234   | 7.50523  | 8  | NH  | NH  |
| -0.40936 | -0.47349 | -0.54871 | 5.89276   | 6.67264   | 8.64291  | 8  | NH  | NH  |
| -0.41371 | -0.44729 | -0.54484 | 6.24664   | 7.06653   | 5.70685  | 8  | NH  | NH  |
| -0.42276 | -0.44543 | -0.54105 | 6.16717   | 6.39542   | 4.67294  | 8  | NH  | NH  |
| -0.62270 | -0.59756 | -0.54736 | -3.05540  | -7.54365  | -0.13138 | 5  | Gen | Gen |
| -0.62783 | -0.60215 | -0.55025 | -3.46369  | -7.69272  | -0.21087 | 5  | Gen | Gen |
| -0.63003 | -0.59365 | -0.55717 | -3.86975  | -6.90336  | -1.30572 | 5  | Gen | Gen |
| -0.62704 | -0.59565 | -0.54856 | -3.26424  | -7.57260  | -0.75036 | 5  | Gen | Gen |
| -0.95123 | -0.95303 | -0.95564 | -43.30721 | -0.20380  | -1.00425 | 13 | Sin | Sin |
| -0.94936 | -0.95348 | -0.95450 | -43.17613 | -0.23129  | -0.76865 | 13 | Sin | Sin |
| -0.95123 | -0.95235 | -0.95274 | -43.12518 | -0.42731  | -1.04634 | 13 | Sin | Sin |
| -0.95069 | -0.95540 | -0.95378 | -43.20075 | -0.42132  | -0.70602 | 13 | Sin | Sin |
| -0.65001 | -0.65454 | -0.63147 | -9.71534  | -3.61828  | 2.05356  | 14 | Tan | Tan |



|          |          |          |           |          |          |    |     |     |
|----------|----------|----------|-----------|----------|----------|----|-----|-----|
| -0.64486 | -0.65332 | -0.64487 | -10.32377 | -2.19652 | 2.32826  | 14 | Tan | Tan |
| -0.64701 | -0.66295 | -0.63861 | -10.12687 | -3.16760 | 3.10453  | 14 | Tan | Tan |
| -0.65513 | -0.65920 | -0.64555 | -10.79856 | -2.81433 | 1.89156  | 14 | Tan | Tan |
| -0.90477 | -0.90238 | -0.90799 | -38.21892 | -0.36717 | -0.99840 | 11 | Nob | Nob |
| -0.90550 | -0.90516 | -0.90915 | -38.34432 | -0.39967 | -0.81003 | 11 | Nob | Nob |
| -0.90949 | -0.90751 | -0.90395 | -38.20053 | -1.10746 | -0.92917 | 11 | Nob | Nob |
| -0.91001 | -0.90929 | -0.90911 | -38.54888 | -0.75433 | -0.84842 | 11 | Nob | Nob |

**Table S5** Data matrix for the fluorescence response of the array sensor to tangeretin in different concentrations.

| $\Delta I/I_0$ | PDI-1    | PDI-2    | PDI-3    | Factor 1  | Factor 2 | Factor 3 |
|----------------|----------|----------|----------|-----------|----------|----------|
| 200 $\mu$ M    | -0.86451 | -0.88513 | -0.80877 | -30.79666 | 0.14400  | 0.64479  |
| 200 $\mu$ M    | -0.86437 | -0.88314 | -0.86490 | -31.05852 | 1.42545  | 0.55702  |
| 200 $\mu$ M    | -0.87720 | -0.89385 | -0.85646 | -32.17034 | 0.95330  | 0.45838  |
| 200 $\mu$ M    | -0.88111 | -0.88341 | -0.82316 | -31.90035 | 0.03291  | -0.35055 |
| 200 $\mu$ M    | -0.87355 | -0.85496 | -0.84784 | -30.67195 | 0.64813  | -1.52904 |
| 200 $\mu$ M    | -0.87181 | -0.88792 | -0.86599 | -31.69414 | 1.28171  | 0.42144  |
| 100 $\mu$ M    | -0.71340 | -0.75426 | -0.65378 | -16.04183 | -0.15880 | 1.46698  |
| 100 $\mu$ M    | -0.74642 | -0.74409 | -0.64924 | -17.83081 | -1.17582 | -0.90054 |
| 100 $\mu$ M    | -0.74657 | -0.73053 | -0.74493 | -17.98570 | 0.94548  | -1.64235 |
| 100 $\mu$ M    | -0.74613 | -0.75745 | -0.55873 | -17.69137 | -3.17554 | -0.16076 |
| 100 $\mu$ M    | -0.73250 | -0.74402 | -0.66755 | -17.03809 | -0.39350 | -0.14218 |
| 100 $\mu$ M    | -0.75510 | -0.74313 | -0.72821 | -18.82981 | 0.40538  | -1.40319 |
| 50 $\mu$ M     | -0.54708 | -0.56860 | -0.53792 | 1.16958   | 0.54726  | 0.05167  |
| 50 $\mu$ M     | -0.58434 | -0.60716 | -0.58106 | -2.69388  | 0.76737  | 0.20317  |
| 50 $\mu$ M     | -0.56694 | -0.60375 | -0.52840 | -1.15172  | -0.00550 | 0.94226  |
| 50 $\mu$ M     | -0.56182 | -0.59688 | -0.43494 | -0.05269  | -2.05248 | 0.80797  |
| 50 $\mu$ M     | -0.56167 | -0.58701 | -0.42723 | 0.31041   | -2.27675 | 0.25996  |
| 50 $\mu$ M     | -0.58744 | -0.62363 | -0.45651 | -2.66864  | -2.08545 | 0.92333  |
| 25 $\mu$ M     | -0.38297 | -0.41463 | -0.37010 | 17.55940  | 0.16820  | 0.28021  |
| 25 $\mu$ M     | -0.39400 | -0.43115 | -0.39057 | 16.21113  | 0.43696  | 0.61433  |
| 25 $\mu$ M     | -0.38563 | -0.40992 | -0.40563 | 17.32355  | 0.88976  | -0.11871 |
| 25 $\mu$ M     | -0.36988 | -0.42414 | -0.40568 | 17.89718  | 1.37501  | 1.53592  |
| 25 $\mu$ M     | -0.38845 | -0.41694 | -0.38753 | 17.03005  | 0.43742  | 0.11667  |
| 25 $\mu$ M     | -0.37369 | -0.38161 | -0.39466 | 19.04190  | 0.80153  | -1.06203 |
| 12.5 $\mu$ M   | -0.25628 | -0.25800 | -0.21176 | 31.55934  | -0.98144 | -1.67224 |
| 12.5 $\mu$ M   | -0.23271 | -0.29347 | -0.22053 | 31.92423  | 0.01812  | 1.60251  |
| 12.5 $\mu$ M   | -0.22873 | -0.28521 | -0.24840 | 32.27347  | 0.71834  | 1.36385  |
| 12.5 $\mu$ M   | -0.23846 | -0.25128 | -0.23836 | 32.76141  | 0.05791  | -1.07346 |
| 12.5 $\mu$ M   | -0.24053 | -0.26118 | -0.24283 | 32.29290  | 0.15826  | -0.62854 |
| 12.5 $\mu$ M   | -0.23939 | -0.24337 | -0.24273 | 32.92193  | 0.09276  | -1.56685 |

**Table S6** Jackknifed classification matrix for the fluorescence response of the array sensor to tangeretin in different concentrations.

Jackknifed classification matrix showed the 100% correct classification.

|              | 200 $\mu$ M | 100 $\mu$ M | 50 $\mu$ M | 25 $\mu$ M | 12.5 $\mu$ M | %correct   |
|--------------|-------------|-------------|------------|------------|--------------|------------|
| 200 $\mu$ M  | 6           | 0           | 0          | 0          | 0            | 100        |
| 100 $\mu$ M  | 0           | 6           | 0          | 0          | 0            | 100        |
| 50 $\mu$ M   | 0           | 0           | 6          | 0          | 0            | 100        |
| 25 $\mu$ M   | 0           | 0           | 0          | 6          | 0            | 100        |
| 12.5 $\mu$ M | 0           | 0           | 0          | 0          | 6            | 100        |
| <b>Total</b> | 6           | 6           | 6          | 6          | 6            | <b>100</b> |

**Table S7** Data matrix for the fluorescence response of the array sensor to unknown samples (tangeretin in different concentrations).

| Fluorescence Response Pattern |          |          | Results LDA |          |          | Analyte |                |              |
|-------------------------------|----------|----------|-------------|----------|----------|---------|----------------|--------------|
| PDI-1                         | PDI-2    | PDI-3    | Factor1     | Factor2  | Factor3  | Group   | Identification | Verification |
| -0.87610                      | -0.88875 | -0.80856 | -31.65683   | -0.14369 | 0.21777  | 3       | 200 $\mu$ M    | 200 $\mu$ M  |
| -0.87329                      | -0.88441 | -0.78462 | -31.19778   | -0.64230 | 0.12040  | 3       | 200 $\mu$ M    | 200 $\mu$ M  |
| -0.86783                      | -0.88498 | -0.84937 | -31.24733   | 0.98826  | 0.46737  | 3       | 200 $\mu$ M    | 200 $\mu$ M  |
| -0.87288                      | -0.84577 | -0.73798 | -29.69113   | -1.90319 | -2.04051 | 3       | 200 $\mu$ M    | 200 $\mu$ M  |
| -0.75395                      | -0.69969 | -0.71079 | -17.29885   | -0.19056 | -3.78462 | 1       | 100 $\mu$ M    | 100 $\mu$ M  |
| -0.72903                      | -0.73126 | -0.71646 | -16.70682   | 0.75272  | -0.65628 | 1       | 100 $\mu$ M    | 100 $\mu$ M  |
| -0.72037                      | -0.75783 | -0.65661 | -16.61998   | -0.25660 | 1.28919  | 1       | 100 $\mu$ M    | 100 $\mu$ M  |
| -0.74712                      | -0.74154 | -0.60185 | -17.51538   | -2.29466 | -1.09502 | 1       | 100 $\mu$ M    | 100 $\mu$ M  |
| -0.58825                      | -0.59680 | -0.47385 | -1.98779    | -1.84829 | -0.62186 | 5       | 50 $\mu$ M     | 50 $\mu$ M   |
| -0.56266                      | -0.59249 | -0.42789 | 0.07159     | -2.25890 | 0.51395  | 5       | 50 $\mu$ M     | 50 $\mu$ M   |
| -0.55945                      | -0.59704 | -0.51928 | -0.40480    | -0.05457 | 0.97055  | 5       | 50 $\mu$ M     | 50 $\mu$ M   |
| -0.56901                      | -0.59302 | -0.57321 | -1.21653    | 0.91316  | 0.24059  | 5       | 50 $\mu$ M     | 50 $\mu$ M   |
| -0.40237                      | -0.44112 | -0.40538 | 15.27168    | 0.61049  | 0.72272  | 4       | 25 $\mu$ M     | 25 $\mu$ M   |
| -0.38994                      | -0.41761 | -0.40635 | 16.80154    | 0.83405  | 0.07901  | 4       | 25 $\mu$ M     | 25 $\mu$ M   |
| -0.37204                      | -0.41546 | -0.40103 | 18.05609    | 1.16687  | 0.92968  | 4       | 25 $\mu$ M     | 25 $\mu$ M   |
| -0.39502                      | -0.41235 | -0.40206 | 16.66275    | 0.57604  | -0.49383 | 4       | 25 $\mu$ M     | 25 $\mu$ M   |
| -0.23610                      | -0.24437 | -0.24422 | 33.09471    | 0.21786  | -1.33130 | 2       | 12.5 $\mu$ M   | 12.5 $\mu$ M |
| -0.24112                      | -0.25918 | -0.23378 | 32.37100    | -0.07523 | -0.77560 | 2       | 12.5 $\mu$ M   | 12.5 $\mu$ M |
| -0.22900                      | -0.27361 | -0.25239 | 32.59362    | 0.74248  | 0.69915  | 2       | 12.5 $\mu$ M   | 12.5 $\mu$ M |
| -0.22988                      | -0.29167 | -0.26319 | 31.91030    | 1.06147  | 1.66842  | 2       | 12.5 $\mu$ M   | 12.5 $\mu$ M |

**Table S8** Data matrix for the fluorescence response of the array sensor to hesperidin in different concentrations.

| $\Delta I/I_0$ | PDI-1 | PDI-2 | PDI-3 | Factor 1 | Factor 2 | Factor 3 |
|----------------|-------|-------|-------|----------|----------|----------|
|----------------|-------|-------|-------|----------|----------|----------|

|              |          |          |          |           |          |          |
|--------------|----------|----------|----------|-----------|----------|----------|
| 1000 $\mu$ M | -0.98211 | -0.99538 | -0.99653 | -26.64627 | -1.95459 | 0.70503  |
| 1000 $\mu$ M | -0.99331 | -0.99396 | -0.99520 | -26.72482 | -2.35876 | 0.02096  |
| 1000 $\mu$ M | -0.98917 | -0.99353 | -0.99617 | -26.64355 | -2.27297 | 0.25545  |
| 1000 $\mu$ M | -0.99406 | -0.99491 | -0.99349 | -26.75589 | -2.29353 | -0.03541 |
| 1000 $\mu$ M | -0.99288 | -0.99515 | -0.99094 | -26.67611 | -2.18832 | -0.03474 |
| 1000 $\mu$ M | -0.99427 | -0.99386 | -0.97427 | -26.13358 | -1.94775 | -0.61299 |
| 500 $\mu$ M  | -0.92553 | -0.97074 | -0.93747 | -22.14561 | -0.28021 | 1.28978  |
| 500 $\mu$ M  | -0.94837 | -0.97796 | -0.89966 | -21.99690 | 0.20903  | -0.74233 |
| 500 $\mu$ M  | -0.94880 | -0.97977 | -0.89495 | -21.99569 | 0.39713  | -0.83592 |
| 500 $\mu$ M  | -0.94581 | -0.97525 | -0.89025 | -21.48883 | 0.33946  | -0.95521 |
| 500 $\mu$ M  | -0.92276 | -0.98126 | -0.85893 | -20.56076 | 2.07076  | -0.38786 |
| 500 $\mu$ M  | -0.89966 | -0.96114 | -0.90387 | -20.01314 | 0.71885  | 1.42950  |
| 250 $\mu$ M  | -0.80716 | -0.86724 | -0.79920 | -8.69615  | 0.64323  | 0.39146  |
| 250 $\mu$ M  | -0.80815 | -0.87487 | -0.74492 | -7.68192  | 2.19668  | -0.91174 |
| 250 $\mu$ M  | -0.82079 | -0.85212 | -0.76254 | -6.85187  | 0.15389  | -1.85320 |
| 250 $\mu$ M  | -0.82559 | -0.88357 | -0.76015 | -9.06046  | 1.80562  | -1.13851 |
| 250 $\mu$ M  | -0.78539 | -0.88108 | -0.75068 | -7.84108  | 3.13761  | 0.67238  |
| 250 $\mu$ M  | -0.78671 | -0.87742 | -0.81356 | -9.42322  | 1.54862  | 2.22105  |
| 125 $\mu$ M  | -0.59362 | -0.68268 | -0.60405 | 13.85351  | 1.26921  | 0.34336  |
| 125 $\mu$ M  | -0.60608 | -0.68171 | -0.59760 | 13.86623  | 0.96011  | -0.53479 |
| 125 $\mu$ M  | -0.53662 | -0.63852 | -0.59900 | 18.16306  | 0.71578  | 1.80106  |
| 125 $\mu$ M  | -0.58569 | -0.65916 | -0.60687 | 15.55872  | 0.14882  | 0.06990  |
| 125 $\mu$ M  | -0.57856 | -0.69295 | -0.51211 | 16.07741  | 4.28068  | -1.05465 |
| 125 $\mu$ M  | -0.56596 | -0.64928 | -0.58845 | 17.15452  | 0.61484  | 0.29198  |
| 62.5 $\mu$ M | -0.34862 | -0.45046 | -0.41880 | 40.03308  | 0.02150  | 0.68266  |
| 62.5 $\mu$ M | -0.35879 | -0.43733 | -0.41272 | 40.92457  | -0.90101 | -0.46457 |
| 62.5 $\mu$ M | -0.35035 | -0.44689 | -0.43500 | 39.78117  | -0.57783 | 0.92005  |
| 62.5 $\mu$ M | -0.37052 | -0.42956 | -0.44070 | 40.43308  | -2.30157 | -0.57557 |
| 62.5 $\mu$ M | -0.36606 | -0.42555 | -0.43649 | 40.91830  | -2.29434 | -0.58521 |
| 62.5 $\mu$ M | -0.36480 | -0.43179 | -0.43432 | 40.57219  | -1.86093 | -0.37195 |

**Table S9** Jackknifed classification matrix for the fluorescence response of the array sensor to hesperidin in different concentrations.

Jackknifed classification matrix showed the 100% correct classification.

|              | 1000 $\mu$ M | 500 $\mu$ M | 250 $\mu$ M | 125 $\mu$ M | 62.5 $\mu$ M | %correct   |
|--------------|--------------|-------------|-------------|-------------|--------------|------------|
| 1000 $\mu$ M | 6            | 0           | 0           | 0           | 0            | 100        |
| 500 $\mu$ M  | 0            | 6           | 0           | 0           | 0            | 100        |
| 250 $\mu$ M  | 0            | 0           | 6           | 0           | 0            | 100        |
| 125 $\mu$ M  | 0            | 0           | 0           | 6           | 0            | 100        |
| 62.5 $\mu$ M | 0            | 0           | 0           | 0           | 6            | 100        |
| <b>Total</b> | 6            | 6           | 6           | 6           | 6            | <b>100</b> |

**Table S10** Data matrix for the fluorescence response of the array sensor to unknown samples (hesperidin in different concentrations).

| Fluorescence Response Pattern |          |          | Results LDA |          |          | Analyte |                |              |
|-------------------------------|----------|----------|-------------|----------|----------|---------|----------------|--------------|
| PDI-1                         | PDI-2    | PDI-3    | Factor1     | Factor2  | Factor3  | Group   | Identification | Verification |
| -0.99444                      | -0.99422 | -0.97119 | -26.07316   | -1.86697 | -0.69547 | 1       | 1000 µM        | 1000 µM      |
| -0.98822                      | -0.99512 | -0.97348 | -26.08219   | -1.66958 | -0.26901 | 1       | 1000 µM        | 1000 µM      |
| -0.99031                      | -0.99404 | -0.96060 | -25.67647   | -1.52056 | -0.77277 | 1       | 1000 µM        | 1000 µM      |
| -0.99054                      | -0.99483 | -0.99160 | -26.62833   | -2.14660 | 0.09829  | 1       | 1000 µM        | 1000 µM      |
| -0.94246                      | -0.98269 | -0.90239 | -22.29113   | 0.60077  | -0.19403 | 4       | 500 µM         | 500 µM       |
| -0.91762                      | -0.97462 | -0.88938 | -20.87739   | 1.21257  | 0.51106  | 4       | 500 µM         | 500 µM       |
| -0.93076                      | -0.97518 | -0.89790 | -21.41493   | 0.64758  | 0.06135  | 4       | 500 µM         | 500 µM       |
| -0.94353                      | -0.97235 | -0.83384 | -19.61857   | 1.45517  | -2.48941 | 4       | 500 µM         | 500 µM       |
| -0.76973                      | -0.86585 | -0.73455 | -6.01746    | 3.12777  | 0.56255  | 3       | 250 µM         | 250 µM       |
| -0.79342                      | -0.86724 | -0.72131 | -6.18827    | 2.74052  | -1.02825 | 3       | 250 µM         | 250 µM       |
| -0.81378                      | -0.82974 | -0.72701 | -4.13914    | -0.11289 | -3.19974 | 3       | 250 µM         | 250 µM       |
| -0.80925                      | -0.86405 | -0.78005 | -7.96340    | 0.80859  | -0.35611 | 3       | 250 µM         | 250 µM       |
| -0.56750                      | -0.61878 | -0.60751 | 18.69532    | -1.54036 | -0.27078 | 2       | 125 µM         | 125 µM       |
| -0.59919                      | -0.65308 | -0.62147 | 15.30042    | -0.92740 | -0.45041 | 2       | 125 µM         | 125 µM       |
| -0.59908                      | -0.65102 | -0.64414 | 14.79236    | -1.52315 | 0.11492  | 2       | 125 µM         | 125 µM       |
| -0.57380                      | -0.62235 | -0.61027 | 18.24615    | -1.59911 | -0.41407 | 2       | 125 µM         | 125 µM       |
| -0.36847                      | -0.43747 | -0.38641 | 41.48645    | -0.63635 | -1.70685 | 5       | 62.5 µM        | 62.5 µM      |
| -0.36850                      | -0.43394 | -0.39628 | 41.44654    | -1.04517 | -1.55199 | 5       | 62.5 µM        | 62.5 µM      |
| -0.35831                      | -0.44456 | -0.38807 | 41.14203    | 0.04346  | -0.88212 | 5       | 62.5 µM        | 62.5 µM      |
| -0.35262                      | -0.45968 | -0.41083 | 39.54539    | 0.57935  | 0.55178  | 5       | 62.5 µM        | 62.5 µM      |

**Table S11** Data matrix for the fluorescence response of the array sensor to tangeretin and hesperidin in different volume ratio.

| $\Delta I/I_0$ | PDI-1    | PDI-2    | PDI-3    | Factor 1  | Factor 2 | Factor 3 |
|----------------|----------|----------|----------|-----------|----------|----------|
| 100:0          | -0.57162 | -0.54978 | -0.87269 | -25.66638 | 0.90020  | 3.94973  |
| 100:0          | -0.58648 | -0.56039 | -0.88738 | -24.81398 | 1.16068  | 1.86073  |
| 100:0          | -0.58812 | -0.57248 | -0.88630 | -25.52394 | 2.39614  | 2.06950  |
| 100:0          | -0.58196 | -0.56414 | -0.88697 | -24.52992 | 1.78867  | 2.13211  |
| 100:0          | -0.59803 | -0.56589 | -0.89953 | -23.94065 | 1.05896  | 0.12104  |
| 100:0          | -0.59765 | -0.57392 | -0.88789 | -26.25757 | 2.07185  | 1.53573  |
| 75:25          | -0.52668 | -0.49773 | -0.91546 | -11.72734 | -3.00253 | 0.29153  |
| 75:25          | -0.53858 | -0.48196 | -0.91505 | -12.58510 | -5.27577 | -0.33000 |
| 75:25          | -0.55018 | -0.47951 | -0.91921 | -12.95225 | -6.14764 | -1.28046 |
| 75:25          | -0.52037 | -0.48830 | -0.92108 | -9.77936  | -3.77490 | -0.20646 |
| 75:25          | -0.54626 | -0.48827 | -0.93200 | -10.45603 | -5.15510 | -2.44214 |

|       |          |          |          |           |          |          |
|-------|----------|----------|----------|-----------|----------|----------|
| 75:25 | -0.54602 | -0.49991 | -0.93438 | -10.32416 | -3.91502 | -2.55179 |
| 50:50 | -0.47549 | -0.51149 | -0.95158 | -0.22100  | 0.56398  | -1.55101 |
| 50:50 | -0.46141 | -0.53156 | -0.95338 | 0.99423   | 3.38931  | -0.94477 |
| 50:50 | -0.48040 | -0.53538 | -0.95817 | -0.19904  | 2.82777  | -2.17745 |
| 50:50 | -0.47806 | -0.53434 | -0.95551 | -0.41523  | 2.85829  | -1.80139 |
| 50:50 | -0.47625 | -0.54519 | -0.95705 | -0.25330  | 4.09855  | -1.76532 |
| 50:50 | -0.48086 | -0.54158 | -0.96269 | 0.40477   | 3.42332  | -2.62098 |
| 25:75 | -0.38676 | -0.46272 | -0.96722 | 13.18484  | -0.56177 | -0.42043 |
| 25:75 | -0.40734 | -0.47860 | -0.96472 | 10.15300  | 0.17908  | -0.75121 |
| 25:75 | -0.40082 | -0.48382 | -0.97152 | 11.92305  | 0.98238  | -1.18714 |
| 25:75 | -0.40199 | -0.49214 | -0.96563 | 10.48728  | 1.88787  | -0.47055 |
| 25:75 | -0.41256 | -0.49394 | -0.97302 | 10.69697  | 1.48702  | -1.68782 |
| 25:75 | -0.40500 | -0.50048 | -0.96952 | 10.65330  | 2.59829  | -0.91786 |
| 0:100 | -0.26887 | -0.39937 | -0.96089 | 25.99620  | -1.60199 | 4.12286  |
| 0:100 | -0.28746 | -0.41700 | -0.97634 | 26.40437  | -0.77372 | 1.89076  |
| 0:100 | -0.29018 | -0.42398 | -0.97454 | 25.59690  | -0.13379 | 2.07300  |
| 0:100 | -0.31134 | -0.41920 | -0.97858 | 24.28565  | -1.71933 | 0.73027  |
| 0:100 | -0.30332 | -0.41934 | -0.97771 | 24.95024  | -1.30600 | 1.14396  |
| 0:100 | -0.30857 | -0.43090 | -0.97679 | 23.91442  | -0.30479 | 1.18558  |

**Table S12** Jackknifed classification matrix.

Jackknifed classification matrix showed the 100% correct classification.

|              | 100:0 | 75:25 | 50:50 | 25:75 | 0:100 | %correct   |
|--------------|-------|-------|-------|-------|-------|------------|
| 100:0        | 6     | 0     | 0     | 0     | 0     | 100        |
| 75:25        | 0     | 6     | 0     | 0     | 0     | 100        |
| 50:50        | 0     | 0     | 6     | 0     | 0     | 100        |
| 25:75        | 0     | 0     | 0     | 6     | 0     | 100        |
| 0:100        | 0     | 0     | 0     | 0     | 6     | 100        |
| <b>Total</b> | 6     | 6     | 6     | 6     | 6     | <b>100</b> |

**Table S13** Data matrix for the fluorescence response of the array sensor to unknown samples.

| Fluorescence Response Pattern |          |          | Results LDA |          |          | Analyte |                |              |
|-------------------------------|----------|----------|-------------|----------|----------|---------|----------------|--------------|
| PDI-1                         | PDI-2    | PDI-3    | Factor1     | Factor2  | Factor3  | Group   | Identification | Verification |
| -0.59065                      | -0.57338 | -0.88654 | -25.76696   | 2.36754  | 1.95468  | 2       | 100:0          | 100:0        |
| -0.59515                      | -0.58037 | -0.88297 | -27.08311   | 2.94231  | 2.26371  | 2       | 100:0          | 100:0        |
| -0.58670                      | -0.56475 | -0.89429 | -23.69548   | 1.54299  | 1.13632  | 2       | 100:0          | 100:0        |
| -0.59289                      | -0.55083 | -0.90649 | -21.70945   | -0.39237 | -0.64304 | 2       | 100:0          | 100:0        |
| -0.55308                      | -0.51166 | -0.92172 | -13.70290   | -2.85057 | -1.26885 | 5       | 75:25          | 75:25        |
| -0.54966                      | -0.50399 | -0.92749 | -12.07611   | -3.57652 | -1.87585 | 5       | 75:25          | 75:25        |
| -0.54811                      | -0.48806 | -0.93177 | -10.68138   | -5.26515 | -2.49276 | 5       | 75:25          | 75:25        |
| -0.54308                      | -0.47465 | -0.91739 | -12.41316   | -6.30761 | -0.86008 | 5       | 75:25          | 75:25        |

|          |          |          |          |          |          |   |       |       |
|----------|----------|----------|----------|----------|----------|---|-------|-------|
| -0.48790 | -0.52898 | -0.95421 | -1.51678 | 1.81769  | -2.11151 | 4 | 50:50 | 50:50 |
| -0.48401 | -0.54059 | -0.95240 | -1.77518 | 3.27741  | -1.61025 | 4 | 50:50 | 50:50 |
| -0.48941 | -0.52673 | -0.95674 | -1.14650 | 1.47346  | -2.48134 | 4 | 50:50 | 50:50 |
| -0.49366 | -0.53703 | -0.95365 | -2.44225 | 2.41295  | -2.17338 | 4 | 50:50 | 50:50 |
| -0.39959 | -0.50221 | -0.97175 | 11.57108 | 3.02234  | -0.93186 | 3 | 25:75 | 25:75 |
| -0.41009 | -0.49246 | -0.97394 | 11.16268 | 1.43827  | -1.71145 | 3 | 25:75 | 25:75 |
| -0.40693 | -0.48996 | -0.97000 | 10.83991 | 1.36448  | -1.18022 | 3 | 25:75 | 25:75 |
| -0.41825 | -0.49321 | -0.97196 | 9.93777  | 1.14435  | -1.80321 | 3 | 25:75 | 25:75 |
| -0.29600 | -0.43566 | -0.97698 | 25.11228 | 0.81604  | 1.71879  | 1 | 0:100 | 0:100 |
| -0.30430 | -0.42641 | -0.97869 | 24.82809 | -0.60305 | 1.08537  | 1 | 0:100 | 0:100 |
| -0.30256 | -0.42419 | -0.97948 | 25.21644 | -0.76584 | 1.03714  | 1 | 0:100 | 0:100 |
| -0.30031 | -0.43837 | -0.97762 | 24.70574 | 0.89220  | 1.51292  | 1 | 0:100 | 0:100 |

**Table S14** Data matrix for the fluorescence response of the array sensor to 14 flavonoids in carbohydrates (the concentration of 14 flavonoids was 50  $\mu$ M).

| $\Delta I/I_0$ | PDI-1    | PDI-2    | PDI-3    | Factor 1  | Factor 2 | Factor 3 |
|----------------|----------|----------|----------|-----------|----------|----------|
| MH             | -0.48513 | -0.46429 | -0.48566 | 4.41742   | -3.79843 | 1.71453  |
| MH             | -0.51003 | -0.47450 | -0.49107 | 2.28491   | -4.79674 | 0.83094  |
| MH             | -0.51492 | -0.46785 | -0.49627 | 2.02425   | -4.36288 | -0.15662 |
| MH             | -0.50966 | -0.48112 | -0.49497 | 1.76538   | -4.61477 | 1.28748  |
| MH             | -0.49575 | -0.48300 | -0.48082 | 3.26214   | -5.29469 | 2.69305  |
| MH             | -0.49874 | -0.46925 | -0.49490 | 2.90850   | -3.75180 | 1.01390  |
| Neo            | -0.41311 | -0.33388 | -0.41510 | 18.53896  | -3.00215 | -2.46225 |
| Neo            | -0.43695 | -0.33765 | -0.41707 | 16.96735  | -4.07688 | -3.70993 |
| Neo            | -0.40222 | -0.34464 | -0.43892 | 17.21080  | -0.61272 | -1.53583 |
| Neo            | -0.40320 | -0.34592 | -0.44445 | 16.77061  | -0.19184 | -1.64074 |
| Neo            | -0.39731 | -0.34970 | -0.43036 | 17.74548  | -1.30744 | -0.58811 |
| Neo            | -0.41727 | -0.34243 | -0.43087 | 16.98272  | -2.00849 | -2.44884 |
| Bai            | -0.99682 | -0.99773 | -0.99850 | -78.28039 | 3.01709  | -0.84618 |
| Bai            | -0.99679 | -0.99730 | -0.99835 | -78.24949 | 3.01678  | -0.87488 |
| Bai            | -0.99723 | -0.99761 | -0.99844 | -78.29257 | 2.99500  | -0.87996 |
| Bai            | -0.99730 | -0.99749 | -0.99842 | -78.28994 | 2.99357  | -0.89374 |
| Bai            | -0.99682 | -0.99735 | -0.99852 | -78.26372 | 3.02925  | -0.87706 |
| Bai            | -0.99683 | -0.99729 | -0.99852 | -78.26111 | 3.03088  | -0.88300 |
| Api            | -0.96559 | -0.96115 | -0.94337 | -71.63319 | 0.53862  | -0.38224 |
| Api            | -0.96125 | -0.97126 | -0.93064 | -71.11747 | -0.71076 | 1.05133  |
| Api            | -0.96491 | -0.96684 | -0.92982 | -71.05946 | -0.83316 | 0.48349  |
| Api            | -0.95098 | -0.96142 | -0.93343 | -70.27327 | 0.32346  | 0.82499  |
| Api            | -0.94859 | -0.96217 | -0.93513 | -70.28072 | 0.57253  | 0.99092  |
| Api            | -0.96475 | -0.96479 | -0.92295 | -70.54844 | -1.39423 | 0.50949  |
| Dai            | -0.25070 | -0.23321 | -0.34024 | 36.37946  | 0.87979  | 1.58642  |
| Dai            | -0.25955 | -0.23085 | -0.32947 | 36.65255  | -0.46183 | 1.12368  |
| Dai            | -0.25500 | -0.24974 | -0.35569 | 34.46293  | 1.60584  | 2.24654  |

---

|     |          |          |          |           |          |          |
|-----|----------|----------|----------|-----------|----------|----------|
| Dai | -0.25078 | -0.23304 | -0.35223 | 35.67275  | 1.97798  | 1.24883  |
| Dai | -0.26085 | -0.25656 | -0.34560 | 34.42852  | 0.20456  | 2.70029  |
| Dai | -0.26026 | -0.26087 | -0.36713 | 32.98415  | 2.07675  | 2.51511  |
| Hes | -0.47929 | -0.42277 | -0.43048 | 9.93461   | -7.35803 | 0.17778  |
| Hes | -0.47151 | -0.41465 | -0.45168 | 9.47466   | -4.80954 | -0.55448 |
| Hes | -0.48234 | -0.42291 | -0.44741 | 8.76148   | -5.95987 | -0.45308 |
| Hes | -0.48139 | -0.42771 | -0.45041 | 8.41103   | -5.78047 | -0.08319 |
| Hes | -0.47899 | -0.41872 | -0.44964 | 9.00461   | -5.47382 | -0.64157 |
| Hes | -0.46950 | -0.42184 | -0.45986 | 8.76270   | -4.17345 | -0.06175 |
| Fla | 0.25247  | 0.33492  | 0.06359  | 113.77725 | 4.63117  | -2.10680 |
| Fla | 0.23293  | 0.32444  | 0.05915  | 111.97788 | 3.79441  | -2.60481 |
| Fla | 0.23766  | 0.31438  | 0.05002  | 111.22183 | 4.56425  | -1.73229 |
| Fla | 0.22746  | 0.32204  | 0.04402  | 110.67576 | 4.84577  | -3.15704 |
| Fla | 0.21523  | 0.31459  | 0.04597  | 109.78779 | 3.86355  | -3.27062 |
| Fla | 0.22861  | 0.31788  | 0.02722  | 109.54842 | 6.31670  | -3.19423 |
| Pue | -0.04094 | -0.01912 | -0.18912 | 66.56379  | 3.35922  | 1.43608  |
| Pue | 0.00076  | -0.04287 | -0.21070 | 66.41580  | 6.64597  | 5.41781  |
| Pue | -0.04606 | -0.06219 | -0.20429 | 63.38293  | 3.24835  | 4.20755  |
| Pue | -0.03805 | -0.03158 | -0.19079 | 66.03949  | 3.28852  | 2.58568  |
| Pue | -0.02442 | -0.04996 | -0.18955 | 65.98715  | 3.29655  | 4.97008  |
| Pue | -0.04573 | -0.05140 | -0.18803 | 64.86734  | 2.09179  | 3.78442  |
| Nar | -0.27364 | -0.20770 | -0.30955 | 38.15588  | -2.28701 | -1.11389 |
| Nar | -0.26239 | -0.22448 | -0.31402 | 37.71256  | -1.82547 | 0.83837  |
| Nar | -0.27991 | -0.20875 | -0.30978 | 37.75655  | -2.59856 | -1.42992 |
| Nar | -0.28355 | -0.22417 | -0.30583 | 37.07733  | -3.58251 | -0.30220 |
| Nar | -0.28189 | -0.23871 | -0.30154 | 36.74266  | -4.31723 | 1.09750  |
| Nar | -0.28283 | -0.24150 | -0.31014 | 36.05224  | -3.65719 | 1.03622  |
| NH  | -0.39799 | -0.32196 | -0.41681 | 19.80402  | -1.77321 | -2.52264 |
| NH  | -0.38503 | -0.33291 | -0.42567 | 19.46482  | -0.65858 | -1.05300 |
| NH  | -0.40268 | -0.34579 | -0.43592 | 17.31045  | -0.94337 | -1.39053 |
| NH  | -0.41254 | -0.35039 | -0.44441 | 16.06356  | -0.77444 | -1.86465 |
| NH  | -0.41032 | -0.37038 | -0.43536 | 15.78753  | -2.07566 | 0.13873  |
| NH  | -0.39634 | -0.32982 | -0.44837 | 17.65693  | 0.96411  | -2.61921 |
| Gen | -0.45411 | -0.44695 | -0.46957 | 7.84302   | -3.27578 | 2.68815  |
| Gen | -0.45192 | -0.40477 | -0.45753 | 10.63907  | -3.04581 | -0.27885 |
| Gen | -0.47518 | -0.41997 | -0.47101 | 7.88470   | -3.37210 | -0.86848 |
| Gen | -0.44919 | -0.42646 | -0.47078 | 8.98960   | -2.33375 | 1.30215  |
| Gen | -0.45720 | -0.42222 | -0.47363 | 8.58903   | -2.33417 | 0.37738  |
| Gen | -0.45318 | -0.40995 | -0.49938 | 7.85089   | 0.57034  | -1.05098 |
| Sin | -0.92921 | -0.94363 | -0.94064 | -68.70348 | 2.54649  | 0.55962  |
| Sin | -0.93571 | -0.93726 | -0.94102 | -68.77748 | 2.45351  | -0.37717 |
| Sin | -0.93531 | -0.93864 | -0.93905 | -68.70420 | 2.25218  | -0.18758 |
| Sin | -0.93518 | -0.93580 | -0.93940 | -68.58526 | 2.37331  | -0.41915 |
| Sin | -0.93904 | -0.93138 | -0.94275 | -68.78519 | 2.62307  | -1.11105 |

---

|     |          |          |          |           |         |          |
|-----|----------|----------|----------|-----------|---------|----------|
| Sin | -0.93638 | -0.94623 | -0.93320 | -68.76847 | 1.44520 | 0.51693  |
| Tan | -0.66170 | -0.61163 | -0.67549 | -23.16966 | 0.79656 | -2.49447 |
| Tan | -0.62143 | -0.61627 | -0.67289 | -21.07113 | 2.35956 | 0.48850  |
| Tan | -0.62740 | -0.63183 | -0.67528 | -22.25837 | 1.83855 | 1.31268  |
| Tan | -0.65489 | -0.63265 | -0.67471 | -23.73756 | 0.44210 | -0.33754 |
| Tan | -0.63027 | -0.63360 | -0.67081 | -22.22961 | 1.24082 | 1.39458  |
| Tan | -0.65436 | -0.62094 | -0.68911 | -24.01641 | 2.12427 | -1.63832 |
| Nob | -0.91126 | -0.90755 | -0.91603 | -64.60141 | 2.20611 | -0.58480 |
| Nob | -0.89020 | -0.91506 | -0.90826 | -63.36013 | 2.28934 | 1.55838  |
| Nob | -0.90577 | -0.91412 | -0.90922 | -64.20908 | 1.65664 | 0.47571  |
| Nob | -0.89732 | -0.89851 | -0.91773 | -63.53255 | 3.29348 | -0.48587 |
| Nob | -0.91183 | -0.89449 | -0.91049 | -63.69468 | 2.05123 | -1.53430 |
| Nob | -0.90718 | -0.91714 | -0.91351 | -64.67980 | 1.89362 | 0.51854  |

**Table S15** Jackknifed classification matrix.

Jackknifed classification matrix showed the 93% correct classification.

|              | Api      | Bai      | Dai      | Fla      | Gen      | Hes      | MH       | NH       | Nar      | Neo      | Nob      | Pue      | Sin      | Tan      | %correct  |
|--------------|----------|----------|----------|----------|----------|----------|----------|----------|----------|----------|----------|----------|----------|----------|-----------|
| Api          | 6        | 0        | 0        | 0        | 0        | 0        | 0        | 0        | 0        | 0        | 0        | 0        | 0        | 0        | 100       |
| Bai          | 0        | 6        | 0        | 0        | 0        | 0        | 0        | 0        | 0        | 0        | 0        | 0        | 0        | 0        | 100       |
| Dai          | 0        | 0        | 6        | 0        | 0        | 0        | 0        | 0        | 0        | 0        | 0        | 0        | 0        | 0        | 100       |
| Fla          | 0        | 0        | 0        | 6        | 0        | 0        | 0        | 0        | 0        | 0        | 0        | 0        | 0        | 0        | 100       |
| Gen          | 0        | 0        | 0        | 0        | 6        | 0        | 0        | 0        | 0        | 0        | 0        | 0        | 0        | 0        | 100       |
| Hes          | 0        | 0        | 0        | 0        | 0        | 6        | 0        | 0        | 0        | 0        | 0        | 0        | 0        | 0        | 100       |
| MH           | 0        | 0        | 0        | 0        | 0        | 0        | 6        | 0        | 0        | 0        | 0        | 0        | 0        | 0        | 100       |
| NH           | 0        | 0        | 0        | 0        | 0        | 0        | 0        | 3        | 0        | 3        | 0        | 0        | 0        | 0        | 50        |
| Nar          | 0        | 0        | 0        | 0        | 0        | 0        | 0        | 0        | 6        | 0        | 0        | 0        | 0        | 0        | 100       |
| Neo          | 0        | 0        | 0        | 0        | 0        | 0        | 0        | 3        | 0        | 3        | 0        | 0        | 0        | 0        | 50        |
| Nob          | 0        | 0        | 0        | 0        | 0        | 0        | 0        | 0        | 0        | 0        | 6        | 0        | 0        | 0        | 100       |
| Pue          | 0        | 0        | 0        | 0        | 0        | 0        | 0        | 0        | 0        | 0        | 0        | 6        | 0        | 0        | 100       |
| Sin          | 0        | 0        | 0        | 0        | 0        | 0        | 0        | 0        | 0        | 0        | 0        | 0        | 6        | 0        | 100       |
| Tan          | 0        | 0        | 0        | 0        | 0        | 0        | 0        | 0        | 0        | 0        | 0        | 0        | 0        | 6        | 100       |
| <b>Total</b> | <b>6</b> | <b>93</b> |

**Table S16** Data matrix for the fluorescence response of the array sensor to unknown samples.

| Fluorescence Response Pattern |          |          | Results LDA |          |          | Analyte |                |              |
|-------------------------------|----------|----------|-------------|----------|----------|---------|----------------|--------------|
| PDI-1                         | PDI-2    | PDI-3    | Factor1     | Factor2  | Factor3  | Group   | Identification | Verification |
| -0.49933                      | -0.48132 | -0.48953 | 2.63201     | -4.62119 | 2.09903  | 7       | MH             | MH           |
| -0.48896                      | -0.47201 | -0.49997 | 3.00377     | -2.89783 | 1.71911  | 7       | MH             | MH           |
| -0.48474                      | -0.47136 | -0.48696 | 4.03145     | -3.86676 | 2.27837  | 7       | MH             | MH           |
| -0.50902                      | -0.47565 | -0.50529 | 1.44301     | -3.48095 | 0.60953  | 7       | MH             | MH           |
| -0.40606                      | -0.35991 | -0.42589 | 17.06496    | -2.43354 | -0.19069 | 10      | Neo            | Neo          |
| -0.39889                      | -0.33900 | -0.42941 | 18.21498    | -1.15884 | -1.53079 | 8       | NH             | Neo          |



|          |          |          |           |          |          |    |     |     |
|----------|----------|----------|-----------|----------|----------|----|-----|-----|
| -0.41025 | -0.33951 | -0.42893 | 17.61046  | -1.76325 | -2.19266 | 10 | Neo | Neo |
| -0.41051 | -0.35913 | -0.43643 | 16.23835  | -1.66016 | -0.81494 | 10 | Neo | Neo |
| -0.99683 | -0.99720 | -0.99855 | -78.25898 | 3.03675  | -0.89099 | 2  | Bai | Bai |
| -0.99718 | -0.99738 | -0.99850 | -78.28323 | 3.00940  | -0.89650 | 2  | Bai | Bai |
| -0.99665 | -0.99736 | -0.99852 | -78.25528 | 3.03787  | -0.86589 | 2  | Bai | Bai |
| -0.99659 | -0.99738 | -0.99838 | -78.24424 | 3.02773  | -0.85622 | 2  | Bai | Bai |
| -0.95108 | -0.96483 | -0.94584 | -71.17315 | 1.35498  | 0.76486  | 1  | Api | Api |
| -0.95803 | -0.96792 | -0.92346 | -70.36377 | -1.11539 | 1.17292  | 1  | Api | Api |
| -0.95913 | -0.96635 | -0.95317 | -72.10978 | 1.59462  | 0.18641  | 1  | Api | Api |
| -0.95559 | -0.96746 | -0.93218 | -70.72808 | -0.18666 | 1.05781  | 1  | Api | Api |
| -0.25972 | -0.22609 | -0.37180 | 34.35734  | 3.54035  | -0.39975 | 3  | Dai | Dai |
| -0.24515 | -0.23800 | -0.36749 | 34.83906  | 3.49966  | 1.60012  | 3  | Dai | Dai |
| -0.25254 | -0.24681 | -0.35125 | 34.99471  | 1.40339  | 2.28212  | 3  | Dai | Dai |
| -0.25686 | -0.24096 | -0.37107 | 33.86068  | 3.17838  | 1.00789  | 3  | Dai | Dai |
| -0.48746 | -0.42949 | -0.46045 | 7.40787   | -5.20535 | -0.58848 | 6  | Hes | Hes |
| -0.49132 | -0.42699 | -0.46312 | 7.15897   | -5.07390 | -1.10567 | 6  | Hes | Hes |
| -0.48154 | -0.41712 | -0.46167 | 8.22992   | -4.44973 | -1.25200 | 6  | Hes | Hes |
| -0.49230 | -0.42777 | -0.46336 | 7.05594   | -5.12176 | -1.10949 | 6  | Hes | Hes |
| 0.23206  | 0.32566  | 0.04884  | 111.37673 | 4.73051  | -3.03294 | 4  | Fla | Fla |
| 0.23046  | 0.33896  | 0.04384  | 111.61418 | 5.49787  | -4.34684 | 4  | Fla | Fla |
| 0.22383  | 0.32800  | 0.02852  | 109.84015 | 6.26160  | -4.28236 | 4  | Fla | Fla |
| 0.22295  | 0.31524  | 0.03810  | 109.76625 | 4.97215  | -3.04625 | 4  | Fla | Fla |
| -0.04643 | -0.06373 | -0.22097 | 62.30337  | 4.71229  | 3.86514  | 12 | Pue | Pue |
| -0.06046 | -0.03202 | -0.19994 | 64.27466  | 3.03546  | 0.96564  | 12 | Pue | Pue |
| -0.04514 | -0.02979 | -0.20823 | 64.70923  | 4.59448  | 1.52929  | 12 | Pue | Pue |
| -0.04512 | -0.04325 | -0.21966 | 63.40499  | 5.24974  | 2.31980  | 12 | Pue | Pue |
| -0.25850 | -0.23545 | -0.32798 | 36.58280  | -0.68127 | 1.60345  | 3  | Dai | Nar |
| -0.28351 | -0.22282 | -0.32045 | 36.27620  | -2.20459 | -0.79790 | 9  | Nar | Nar |
| -0.26588 | -0.23495 | -0.32398 | 36.44757  | -1.38682 | 1.20405  | 9  | Nar | Nar |
| -0.25527 | -0.23086 | -0.32532 | 37.12759  | -0.63546 | 1.50514  | 3  | Dai | Nar |
| -0.40718 | -0.34517 | -0.45451 | 15.99604  | 0.55822  | -2.21968 | 8  | NH  | NH  |
| -0.39407 | -0.35992 | -0.45899 | 15.74673  | 1.16960  | -0.31526 | 8  | NH  | NH  |
| -0.38950 | -0.38078 | -0.46333 | 14.76293  | 1.18044  | 1.55149  | 8  | NH  | NH  |
| -0.39672 | -0.34785 | -0.44575 | 16.95146  | 0.18195  | -1.10975 | 8  | NH  | NH  |
| -0.47156 | -0.41425 | -0.46393 | 8.76505   | -3.68041 | -0.91680 | 5  | Gen | Gen |
| -0.47181 | -0.43005 | -0.48988 | 6.47785   | -1.77817 | -0.33901 | 5  | Gen | Gen |
| -0.46022 | -0.44588 | -0.50325 | 5.56899   | -0.45834 | 1.32034  | 5  | Gen | Gen |
| -0.46730 | -0.44020 | -0.49383 | 6.01255   | -1.49487 | 0.66397  | 5  | Gen | Gen |
| -0.94687 | -0.94604 | -0.94597 | -70.07906 | 2.11521  | -0.49951 | 13 | Sin | Sin |
| -0.94395 | -0.93382 | -0.94416 | -69.24585 | 2.44465  | -1.25913 | 13 | Sin | Sin |
| -0.92334 | -0.93822 | -0.93643 | -67.88698 | 2.60017  | 0.60154  | 13 | Sin | Sin |
| -0.93062 | -0.93582 | -0.94103 | -68.43823 | 2.74108  | -0.17348 | 13 | Sin | Sin |
| -0.64639 | -0.63608 | -0.68048 | -23.78320 | 1.27855  | 0.32261  | 14 | Tan | Tan |
| -0.65523 | -0.62009 | -0.68114 | -23.55149 | 1.37852  | -1.55068 | 14 | Tan | Tan |

|          |          |          |           |         |          |    |     |     |
|----------|----------|----------|-----------|---------|----------|----|-----|-----|
| -0.66275 | -0.63385 | -0.69322 | -25.31235 | 1.72202 | -1.22779 | 14 | Tan | Tan |
| -0.63162 | -0.63816 | -0.69200 | -23.77059 | 2.98110 | 1.11590  | 14 | Tan | Tan |
| -0.89080 | -0.88688 | -0.91172 | -62.28500 | 3.39574 | -0.85975 | 11 | Nob | Nob |
| -0.91631 | -0.91839 | -0.91433 | -65.27577 | 1.49297 | 0.02279  | 11 | Nob | Nob |
| -0.89414 | -0.91580 | -0.91338 | -63.90961 | 2.54720 | 1.23392  | 11 | Nob | Nob |
| -0.90271 | -0.90916 | -0.91282 | -64.02710 | 2.27657 | 0.16957  | 11 | Nob | Nob |

**Table S17** Data matrix for the fluorescence response of the array sensor to 14 flavonoids in natural acids (the concentration of 14 flavonoids was 50  $\mu$ M).

| <i>AI/I<sub>0</sub></i> | <b>PDI-1</b> | <b>PDI-2</b> | <b>PDI-3</b> | <b>Factor 1</b> | <b>Factor 2</b> | <b>Factor 3</b> |
|-------------------------|--------------|--------------|--------------|-----------------|-----------------|-----------------|
| MH                      | -0.82883     | -0.92038     | -0.97759     | 0.25836         | 0.59309         | 0.91148         |
| MH                      | -0.82652     | -0.92154     | -0.97768     | 0.19525         | 1.70499         | 0.95343         |
| MH                      | -0.82911     | -0.91981     | -0.97761     | 0.33811         | 0.25518         | 1.03805         |
| MH                      | -0.82462     | -0.91960     | -0.97821     | 0.44466         | 1.29266         | 2.28086         |
| MH                      | -0.83264     | -0.92114     | -0.97859     | -0.94198        | 0.24416         | 1.86987         |
| MH                      | -0.82917     | -0.92190     | -0.97739     | 0.04529         | 1.21471         | 0.25316         |
| Neo                     | -0.80004     | -0.91136     | -0.97416     | 7.34238         | 2.33427         | 0.17733         |
| Neo                     | -0.80367     | -0.91185     | -0.97501     | 6.30704         | 1.87055         | 1.01398         |
| Neo                     | -0.80282     | -0.91139     | -0.97537     | 6.25614         | 1.90540         | 1.68484         |
| Neo                     | -0.80400     | -0.91176     | -0.97588     | 5.72046         | 1.89396         | 2.24532         |
| Neo                     | -0.80393     | -0.91408     | -0.97517     | 5.70957         | 2.91653         | 0.72860         |
| Neo                     | -0.80140     | -0.91440     | -0.97423     | 6.52083         | 3.50285         | -0.49579        |
| Bai                     | -0.96737     | -0.98619     | -0.99441     | -38.66507       | 3.08033         | -0.15180        |
| Bai                     | -0.96813     | -0.98426     | -0.99462     | -38.47677       | 2.00550         | 0.51771         |
| Bai                     | -0.96825     | -0.98517     | -0.99455     | -38.63109       | 2.40424         | 0.20088         |
| Bai                     | -0.96963     | -0.98465     | -0.99434     | -38.52868       | 1.80319         | -0.07895        |
| Bai                     | -0.96836     | -0.98506     | -0.99439     | -38.51389       | 2.29820         | -0.00825        |
| Bai                     | -0.96984     | -0.98588     | -0.99432     | -38.79409       | 2.34309         | -0.39401        |
| Api                     | -0.98191     | -0.99146     | -0.99599     | -42.28588       | 2.51702         | -0.16374        |
| Api                     | -0.98228     | -0.99165     | -0.99569     | -42.16274       | 2.47191         | -0.66703        |
| Api                     | -0.98259     | -0.99115     | -0.99562     | -42.04781       | 2.14988         | -0.67284        |
| Api                     | -0.98200     | -0.99100     | -0.99631     | -42.41140       | 2.32769         | 0.39320         |
| Api                     | -0.98499     | -0.99098     | -0.99586     | -42.41919       | 1.55567         | -0.46853        |
| Api                     | -0.98509     | -0.99151     | -0.99615     | -42.72353       | 1.83183         | -0.19053        |
| Dai                     | -0.79238     | -0.90761     | -0.97401     | 9.00281         | 2.27391         | 1.37303         |
| Dai                     | -0.78429     | -0.90516     | -0.97238     | 11.40999        | 2.69478         | 0.21030         |
| Dai                     | -0.79297     | -0.90808     | -0.97326     | 9.33849         | 2.23923         | 0.15764         |
| Dai                     | -0.79768     | -0.90909     | -0.97352     | 8.47622         | 1.68114         | -0.05002        |
| Dai                     | -0.79695     | -0.90828     | -0.97431     | 8.19796         | 1.58752         | 1.31080         |
| Dai                     | -0.79748     | -0.91143     | -0.97441     | 7.42408         | 3.00411         | 0.70880         |
| Hes                     | -0.78871     | -0.90430     | -0.97336     | 10.48976        | 1.41717         | 1.46764         |
| Hes                     | -0.79249     | -0.90514     | -0.97351     | 9.83029         | 0.97551         | 1.20993         |
| Hes                     | -0.79575     | -0.90639     | -0.97411     | 8.84647         | 0.91753         | 1.53471         |

---

|     |          |          |          |           |          |          |
|-----|----------|----------|----------|-----------|----------|----------|
| Hes | -0.79944 | -0.90820 | -0.97454 | 7.80517   | 1.01477  | 1.47543  |
| Hes | -0.80188 | -0.90906 | -0.97488 | 7.15791   | 0.91362  | 1.57855  |
| Hes | -0.79392 | -0.90977 | -0.97430 | 8.20409   | 3.00672  | 1.19610  |
| Fla | -0.57806 | -0.80139 | -0.94471 | 72.28569  | -4.23541 | -0.66368 |
| Fla | -0.57873 | -0.79874 | -0.94483 | 72.69084  | -5.65528 | 0.04514  |
| Fla | -0.58809 | -0.80220 | -0.94696 | 69.61357  | -5.79979 | 1.60398  |
| Fla | -0.58026 | -0.79736 | -0.94505 | 72.67756  | -6.63958 | 0.54884  |
| Fla | -0.58906 | -0.80649 | -0.94656 | 68.88611  | -4.01847 | 0.00712  |
| Fla | -0.59152 | -0.80739 | -0.94664 | 68.39118  | -4.13773 | -0.25921 |
| Pue | -0.68116 | -0.87187 | -0.95899 | 37.69517  | 8.28903  | -3.74023 |
| Pue | -0.69863 | -0.86988 | -0.95926 | 36.13991  | 3.32871  | -4.21414 |
| Pue | -0.69011 | -0.87699 | -0.95917 | 35.59703  | 8.71839  | -5.29772 |
| Pue | -0.68121 | -0.87129 | -0.96038 | 36.89591  | 8.22598  | -1.63728 |
| Pue | -0.69318 | -0.87741 | -0.96156 | 33.62528  | 8.60545  | -2.22184 |
| Pue | -0.69508 | -0.87724 | -0.96134 | 33.60924  | 8.04733  | -2.63625 |
| Nar | -0.77552 | -0.90279 | -0.97518 | 10.96069  | 4.03378  | 5.37945  |
| Nar | -0.78379 | -0.90631 | -0.97515 | 9.39950   | 3.82082  | 3.93453  |
| Nar | -0.78845 | -0.90909 | -0.97465 | 8.67212   | 4.00317  | 2.25514  |
| Nar | -0.79873 | -0.90830 | -0.97433 | 8.00058   | 1.18772  | 1.19747  |
| Nar | -0.79337 | -0.90557 | -0.97530 | 8.47749   | 1.27036  | 3.59025  |
| Nar | -0.78798 | -0.90825 | -0.97456 | 8.95722   | 3.69084  | 2.34556  |
| NH  | -0.78900 | -0.89811 | -0.97108 | 13.24910  | -2.01491 | -0.42853 |
| NH  | -0.79860 | -0.89909 | -0.97009 | 12.71090  | -3.91894 | -2.77060 |
| NH  | -0.79523 | -0.89535 | -0.97229 | 12.38857  | -4.59289 | 1.44636  |
| NH  | -0.79823 | -0.90206 | -0.97003 | 12.17169  | -2.41035 | -3.49047 |
| NH  | -0.79696 | -0.90051 | -0.97101 | 11.97877  | -2.70593 | -1.65415 |
| NH  | -0.78832 | -0.90063 | -0.97035 | 13.27603  | -0.75789 | -1.97706 |
| Gen | -0.86760 | -0.93177 | -0.97962 | -7.41335  | -2.54270 | -1.62961 |
| Gen | -0.86956 | -0.93394 | -0.98108 | -9.02707  | -1.70757 | -0.18215 |
| Gen | -0.86849 | -0.93141 | -0.98083 | -8.22126  | -2.72661 | 0.09533  |
| Gen | -0.86701 | -0.93497 | -0.97978 | -8.12411  | -0.83165 | -2.07108 |
| Gen | -0.86662 | -0.93318 | -0.97925 | -7.36189  | -1.69626 | -2.40193 |
| Gen | -0.85971 | -0.93326 | -0.98082 | -7.69941  | 0.20041  | 0.32254  |
| Sin | -0.96410 | -0.97480 | -0.99154 | -34.07640 | -2.13442 | -1.45362 |
| Sin | -0.96663 | -0.97444 | -0.99173 | -34.38642 | -2.86354 | -1.29144 |
| Sin | -0.96377 | -0.97364 | -0.99222 | -34.24505 | -2.50752 | -0.21057 |
| Sin | -0.96755 | -0.97503 | -0.99216 | -34.88529 | -2.71912 | -0.88080 |
| Sin | -0.96671 | -0.97408 | -0.99270 | -34.95266 | -2.89945 | 0.15469  |
| Sin | -0.96663 | -0.97503 | -0.99250 | -35.01160 | -2.45341 | -0.33590 |
| Tan | -0.84263 | -0.91467 | -0.97780 | -0.10392  | -5.32588 | 1.45115  |
| Tan | -0.84343 | -0.91699 | -0.97751 | -0.47602  | -4.43525 | 0.45474  |
| Tan | -0.85040 | -0.91614 | -0.97826 | -1.50759  | -6.33609 | 1.19021  |
| Tan | -0.85413 | -0.91962 | -0.97703 | -1.80519  | -5.71757 | -1.61169 |
| Tan | -0.85340 | -0.91999 | -0.97750 | -2.11615  | -5.29547 | -0.96513 |

---

|     |          |          |          |           |          |          |
|-----|----------|----------|----------|-----------|----------|----------|
| Tan | -0.84617 | -0.91573 | -0.97752 | -0.50503  | -5.67472 | 0.55376  |
| Nob | -0.94068 | -0.96079 | -0.98847 | -26.74643 | -3.98665 | -0.95936 |
| Nob | -0.94544 | -0.95957 | -0.98826 | -26.84066 | -5.71313 | -1.34106 |
| Nob | -0.94709 | -0.96230 | -0.98935 | -28.29488 | -4.59463 | -0.51972 |
| Nob | -0.94660 | -0.96188 | -0.98892 | -27.87525 | -4.75833 | -1.00006 |
| Nob | -0.94809 | -0.96245 | -0.98827 | -27.71867 | -4.93156 | -2.16221 |
| Nob | -0.93993 | -0.96227 | -0.98953 | -27.67508 | -2.92619 | 0.28109  |

**Table S18** Jackknifed classification matrix.

Jackknifed classification matrix showed the 92% correct classification.

|              | Api      | Bai      | Dai      | Fla      | Gen      | Hes      | MH       | NH       | Nar      | Neo      | Nob      | Pue      | Sin      | Tan      | %correct  |
|--------------|----------|----------|----------|----------|----------|----------|----------|----------|----------|----------|----------|----------|----------|----------|-----------|
| Api          | 6        | 0        | 0        | 0        | 0        | 0        | 0        | 0        | 0        | 0        | 0        | 0        | 0        | 0        | 100       |
| Bai          | 0        | 6        | 0        | 0        | 0        | 0        | 0        | 0        | 0        | 0        | 0        | 0        | 0        | 0        | 100       |
| Dai          | 0        | 0        | 4        | 0        | 0        | 1        | 0        | 0        | 0        | 1        | 0        | 0        | 0        | 0        | 67        |
| Fla          | 0        | 0        | 0        | 6        | 0        | 0        | 0        | 0        | 0        | 0        | 0        | 0        | 0        | 0        | 100       |
| Gen          | 0        | 0        | 0        | 0        | 6        | 0        | 0        | 0        | 0        | 0        | 0        | 0        | 0        | 0        | 100       |
| Hes          | 0        | 0        | 2        | 0        | 0        | 3        | 0        | 0        | 0        | 1        | 0        | 0        | 0        | 0        | 50        |
| MH           | 0        | 0        | 0        | 0        | 0        | 0        | 6        | 0        | 0        | 0        | 0        | 0        | 0        | 0        | 100       |
| NH           | 0        | 0        | 0        | 0        | 0        | 0        | 0        | 6        | 0        | 0        | 0        | 0        | 0        | 0        | 100       |
| Nar          | 0        | 0        | 0        | 0        | 0        | 2        | 0        | 0        | 4        | 0        | 0        | 0        | 0        | 0        | 67        |
| Neo          | 0        | 0        | 0        | 0        | 0        | 0        | 0        | 0        | 0        | 6        | 0        | 0        | 0        | 0        | 100       |
| Nob          | 0        | 0        | 0        | 0        | 0        | 0        | 0        | 0        | 0        | 0        | 6        | 0        | 0        | 0        | 100       |
| Pue          | 0        | 0        | 0        | 0        | 0        | 0        | 0        | 0        | 0        | 0        | 0        | 6        | 0        | 0        | 100       |
| Sin          | 0        | 0        | 0        | 0        | 0        | 0        | 0        | 0        | 0        | 0        | 0        | 0        | 6        | 0        | 100       |
| Tan          | 0        | 0        | 0        | 0        | 0        | 0        | 0        | 0        | 0        | 0        | 0        | 0        | 0        | 6        | 100       |
| <b>Total</b> | <b>6</b> | <b>4</b> | <b>8</b> | <b>6</b> | <b>6</b> | <b>6</b> | <b>6</b> | <b>92</b> |

**Table S19** Data matrix for the fluorescence response of the array sensor to unknown samples.

| Fluorescence Response Pattern |          |          | Results LDA |          |          | Analyte |                |              |
|-------------------------------|----------|----------|-------------|----------|----------|---------|----------------|--------------|
| PDI-1                         | PDI-2    | PDI-3    | Factor1     | Factor2  | Factor3  | Group   | Identification | Verification |
| -0.83603                      | -0.91896 | -0.97870 | -0.91499    | -1.57569 | 2.27171  | 7       | MH             | MH           |
| -0.83609                      | -0.92181 | -0.97693 | -0.34333    | -0.50307 | -0.90116 | 7       | MH             | MH           |
| -0.83469                      | -0.92095 | -0.97736 | -0.30682    | -0.52369 | 0.01491  | 7       | MH             | MH           |
| -0.83675                      | -0.92040 | -0.97709 | -0.22592    | -1.30948 | -0.40360 | 7       | MH             | MH           |
| -0.80150                      | -0.91347 | -0.97472 | 6.38615     | 3.10731  | 0.39648  | 10      | Neo            | Neo          |
| -0.80215                      | -0.91015 | -0.97456 | 7.11210     | 1.32714  | 0.86429  | 10      | Neo            | Neo          |
| -0.80590                      | -0.91329 | -0.97500 | 5.78881     | 2.04704  | 0.50491  | 10      | Neo            | Neo          |
| -0.80571                      | -0.91313 | -0.97559 | 5.45345     | 2.11037  | 1.39607  | 10      | Neo            | Neo          |
| -0.96912                      | -0.98547 | -0.99455 | -38.78560   | 2.35145  | 0.07542  | 2       | Bai            | Bai          |
| -0.96947                      | -0.98508 | -0.99446 | -38.67954   | 2.06525  | 0.00264  | 2       | Bai            | Bai          |
| -0.96909                      | -0.98493 | -0.99388 | -38.22797   | 1.98649  | -0.75961 | 2       | Bai            | Bai          |
| -0.96742                      | -0.98423 | -0.99429 | -38.18536   | 2.10257  | 0.11237  | 2       | Bai            | Bai          |

|          |          |          |           |          |          |    |     |     |
|----------|----------|----------|-----------|----------|----------|----|-----|-----|
| -0.98390 | -0.99212 | -0.99598 | -42.61826 | 2.37404  | -0.47664 | 1  | Api | Api |
| -0.98439 | -0.99176 | -0.99606 | -42.64836 | 2.09898  | -0.31589 | 1  | Api | Api |
| -0.98403 | -0.99155 | -0.99595 | -42.49311 | 2.06449  | -0.40476 | 1  | Api | Api |
| -0.98195 | -0.99132 | -0.99609 | -42.32694 | 2.45908  | 0.00262  | 1  | Api | Api |
| -0.78284 | -0.90732 | -0.97315 | 10.60458  | 4.19879  | 0.92825  | 3  | Dai | Dai |
| -0.79285 | -0.90809 | -0.97378 | 9.00588   | 2.36081  | 0.90272  | 3  | Dai | Dai |
| -0.79119 | -0.90636 | -0.97407 | 9.34489   | 1.95285  | 1.82923  | 6  | Hes | Dai |
| -0.79331 | -0.90881 | -0.97393 | 8.71004   | 2.62449  | 0.92551  | 3  | Dai | Dai |
| -0.78977 | -0.91003 | -0.97516 | 8.01297   | 4.23080  | 2.66359  | 9  | Nar | Hes |
| -0.79272 | -0.90853 | -0.97468 | 8.33462   | 2.75011  | 2.09972  | 9  | Nar | Hes |
| -0.80152 | -0.90683 | -0.97517 | 7.46462   | -0.03014 | 2.52137  | 6  | Hes | Hes |
| -0.79433 | -0.90405 | -0.97375 | 9.71627   | 0.05765  | 1.64882  | 6  | Hes | Hes |
| -0.58370 | -0.80283 | -0.94691 | 69.96364  | -4.48782 | 1.72470  | 4  | Fla | Fla |
| -0.58247 | -0.80168 | -0.94802 | 69.59971  | -4.57944 | 3.65295  | 4  | Fla | Fla |
| -0.59012 | -0.80687 | -0.94616 | 68.95890  | -4.14588 | -0.72066 | 4  | Fla | Fla |
| -0.59376 | -0.80403 | -0.94701 | 68.62154  | -6.21822 | 0.84021  | 4  | Fla | Fla |
| -0.68466 | -0.87452 | -0.96023 | 35.96975  | 8.96285  | -2.82680 | 12 | Pue | Pue |
| -0.69110 | -0.87388 | -0.96068 | 35.15115  | 7.23483  | -2.53330 | 12 | Pue | Pue |
| -0.68593 | -0.87433 | -0.96019 | 35.90847  | 8.56878  | -2.94479 | 12 | Pue | Pue |
| -0.70328 | -0.87233 | -0.96096 | 34.03663  | 3.71703  | -2.68754 | 12 | Pue | Pue |
| -0.79125 | -0.90817 | -0.97455 | 8.64885   | 2.89200  | 2.09970  | 9  | Nar | Nar |
| -0.79028 | -0.90480 | -0.97505 | 9.11545   | 1.57225  | 3.64483  | 9  | Nar | Nar |
| -0.79336 | -0.90825 | -0.97447 | 8.46677   | 2.42850  | 1.81375  | 6  | Hes | Nar |
| -0.79719 | -0.90403 | -0.97434 | 9.03510   | -0.51745 | 2.28702  | 6  | Hes | Nar |
| -0.79203 | -0.90113 | -0.97131 | 12.16269  | -1.21959 | -1.00289 | 8  | NH  | NH  |
| -0.79462 | -0.90184 | -0.97163 | 11.53405  | -1.42005 | -0.89374 | 8  | NH  | NH  |
| -0.79058 | -0.90124 | -0.97150 | 12.15794  | -0.79833 | -0.63772 | 8  | NH  | NH  |
| -0.79635 | -0.89764 | -0.97087 | 12.73179  | -3.97565 | -1.16911 | 8  | NH  | NH  |
| -0.85945 | -0.93148 | -0.98013 | -6.84948  | -0.71460 | -0.24131 | 5  | Gen | Gen |
| -0.86868 | -0.93471 | -0.98059 | -8.76944  | -1.21568 | -0.99170 | 5  | Gen | Gen |
| -0.86958 | -0.93423 | -0.98087 | -8.94854  | -1.60584 | -0.55222 | 5  | Gen | Gen |
| -0.86911 | -0.93484 | -0.97986 | -8.36369  | -1.36909 | -2.08800 | 5  | Gen | Gen |
| -0.96919 | -0.97507 | -0.99178 | -34.80802 | -3.14436 | -1.55945 | 13 | Sin | Sin |
| -0.96908 | -0.97536 | -0.99235 | -35.23289 | -2.88518 | -0.79951 | 13 | Sin | Sin |
| -0.96755 | -0.97547 | -0.99189 | -34.79894 | -2.55292 | -1.36311 | 13 | Sin | Sin |
| -0.96691 | -0.97509 | -0.99191 | -34.66423 | -2.58702 | -1.20507 | 13 | Sin | Sin |
| -0.85446 | -0.91726 | -0.97729 | -1.52048  | -6.89284 | -0.73544 | 14 | Tan | Tan |
| -0.85286 | -0.91850 | -0.97690 | -1.35471  | -5.98949 | -1.45367 | 14 | Tan | Tan |
| -0.85581 | -0.91968 | -0.97715 | -2.07115  | -6.05683 | -1.57208 | 14 | Tan | Tan |
| -0.84402 | -0.91677 | -0.97763 | -0.57400  | -4.65857 | 0.64236  | 14 | Tan | Tan |
| -0.94701 | -0.96123 | -0.98860 | -27.57501 | -5.21477 | -1.33924 | 11 | Nob | Nob |
| -0.94222 | -0.95969 | -0.98912 | -27.10387 | -4.76967 | 0.10348  | 11 | Nob | Nob |
| -0.94506 | -0.96226 | -0.98950 | -28.17963 | -4.12155 | -0.14263 | 11 | Nob | Nob |
| -0.94511 | -0.96216 | -0.98942 | -28.10945 | -4.19725 | -0.23874 | 11 | Nob | Nob |

**Table S20** Data matrix for the fluorescence response of the array sensor to 8 red grape wines.

| $\Delta I/I_0$ | PDI-1    | PDI-2    | PDI-3    | Factor 1 | Factor 2 | Factor 3 |
|----------------|----------|----------|----------|----------|----------|----------|
| Wine 1         | -0.20014 | -0.18520 | -0.21420 | -3.94701 | 2.51029  | 2.85284  |
| Wine 1         | -0.18559 | -0.18506 | -0.19414 | -2.28274 | 3.35954  | 2.36610  |
| Wine 1         | -0.19572 | -0.19552 | -0.20972 | -3.73502 | 3.63713  | 3.21454  |
| Wine 1         | -0.22463 | -0.19241 | -0.23064 | -6.54427 | 2.41686  | 2.93681  |
| Wine 1         | -0.19930 | -0.20205 | -0.20606 | -4.11874 | 4.36464  | 3.09081  |
| Wine 1         | -0.19020 | -0.19934 | -0.19664 | -3.08004 | 4.53099  | 2.86458  |
| Wine 2         | -0.18363 | -0.16320 | -0.15358 | -0.68672 | 3.05029  | -0.79003 |
| Wine 2         | -0.17810 | -0.15118 | -0.14235 | 0.32378  | 2.44146  | -1.66541 |
| Wine 2         | -0.17974 | -0.16449 | -0.13399 | 0.03632  | 3.97793  | -1.70004 |
| Wine 2         | -0.19353 | -0.15091 | -0.15121 | -1.15994 | 2.01011  | -1.89252 |
| Wine 2         | -0.19320 | -0.15773 | -0.14821 | -1.23703 | 2.74802  | -1.77940 |
| Wine 2         | -0.19906 | -0.15119 | -0.15820 | -1.78494 | 1.73311  | -1.73564 |
| Wine 3         | -0.20975 | -0.13562 | -0.17907 | -2.75137 | -0.55492 | -1.64703 |
| Wine 3         | -0.19890 | -0.14301 | -0.23047 | -3.14703 | -1.95494 | 2.17484  |
| Wine 3         | -0.22579 | -0.14000 | -0.23368 | -5.40238 | -2.43659 | 0.96112  |
| Wine 3         | -0.20520 | -0.14122 | -0.20226 | -3.01577 | -0.98281 | 0.15159  |
| Wine 3         | -0.22279 | -0.13897 | -0.18949 | -4.15900 | -0.71618 | -1.52469 |
| Wine 3         | -0.21002 | -0.13738 | -0.18789 | -3.01045 | -0.75646 | -1.07301 |
| Wine 4         | -0.25758 | -0.10580 | -0.22371 | -7.00371 | -5.20712 | -2.50695 |
| Wine 4         | -0.24415 | -0.11205 | -0.22733 | -6.11040 | -4.75177 | -1.40482 |
| Wine 4         | -0.25975 | -0.11318 | -0.24573 | -7.85201 | -5.44686 | -1.02559 |
| Wine 4         | -0.24867 | -0.12405 | -0.23094 | -6.86826 | -3.83073 | -0.92827 |
| Wine 4         | -0.25788 | -0.12970 | -0.22038 | -7.55205 | -2.91702 | -1.75911 |
| Wine 4         | -0.26144 | -0.14327 | -0.24622 | -8.75466 | -2.75872 | 0.12709  |
| Wine 5         | -0.13345 | -0.11147 | -0.12914 | 5.35505  | -0.46817 | -1.90081 |
| Wine 5         | -0.10553 | -0.09727 | -0.15393 | 7.51347  | -2.67849 | 0.31215  |
| Wine 5         | -0.13114 | -0.11598 | -0.14006 | 5.19769  | -0.50059 | -0.97140 |
| Wine 5         | -0.10956 | -0.09294 | -0.14978 | 7.37321  | -2.91213 | -0.29653 |
| Wine 5         | -0.11174 | -0.11980 | -0.14090 | 6.71463  | -0.13356 | 0.15561  |
| Wine 5         | -0.11261 | -0.09586 | -0.12931 | 7.49173  | -1.82215 | -1.52311 |
| Wine 6         | -0.17108 | -0.15572 | -0.13159 | 1.03528  | 3.30986  | -1.77896 |
| Wine 6         | -0.15687 | -0.15345 | -0.12710 | 2.38495  | 3.33070  | -1.45547 |
| Wine 6         | -0.13732 | -0.19161 | -0.13197 | 2.97028  | 6.63103  | 1.28884  |
| Wine 6         | -0.17510 | -0.17036 | -0.12028 | 0.58000  | 5.08010  | -2.04647 |
| Wine 6         | -0.15205 | -0.17096 | -0.12648 | 2.36680  | 4.94979  | -0.56071 |
| Wine 6         | -0.17703 | -0.19548 | -0.13961 | -0.63076 | 6.55031  | -0.00093 |
| Wine 7         | -0.13492 | -0.14536 | -0.13503 | 4.25822  | 2.34236  | -0.26890 |
| Wine 7         | -0.14322 | -0.13522 | -0.13225 | 3.87389  | 1.51732  | -1.23299 |
| Wine 7         | -0.13882 | -0.13176 | -0.15575 | 3.81593  | 0.25889  | 0.21356  |
| Wine 7         | -0.14238 | -0.13337 | -0.15704 | 3.44850  | 0.34107  | 0.18356  |

|        |          |          |          |         |          |          |
|--------|----------|----------|----------|---------|----------|----------|
| Wine 7 | -0.15225 | -0.13121 | -0.14015 | 3.04187 | 0.80645  | -1.36166 |
| Wine 7 | -0.13358 | -0.13941 | -0.18082 | 3.51854 | -0.05970 | 2.23678  |
| Wine 8 | -0.14139 | -0.08740 | -0.19747 | 3.79436 | -5.45249 | 0.75698  |
| Wine 8 | -0.13369 | -0.09401 | -0.18922 | 4.45676 | -4.49687 | 0.90529  |
| Wine 8 | -0.14230 | -0.10042 | -0.21098 | 3.09745 | -4.83185 | 2.02552  |
| Wine 8 | -0.13222 | -0.09272 | -0.20719 | 4.22004 | -5.34247 | 1.97590  |
| Wine 8 | -0.12993 | -0.09610 | -0.21352 | 4.18946 | -5.28939 | 2.59097  |
| Wine 8 | -0.13884 | -0.08946 | -0.20574 | 3.77611 | -5.59630 | 1.44500  |

**Table S21** Jackknifed classification matrix.

Jackknifed classification matrix showed the 100% correct classification.

|              | Wine 1   | Wine 2   | Wine 3   | Wine 4   | Wine 5   | Wine 6   | Wine 7   | Wine 8   | %correct  |
|--------------|----------|----------|----------|----------|----------|----------|----------|----------|-----------|
| Wine 1       | 6        | 0        | 0        | 0        | 0        | 0        | 0        | 0        | 100       |
| Wine 2       | 0        | 6        | 0        | 0        | 0        | 0        | 0        | 0        | 100       |
| Wine 3       | 0        | 0        | 6        | 0        | 0        | 0        | 0        | 0        | 100       |
| Wine 4       | 0        | 0        | 0        | 6        | 0        | 0        | 0        | 0        | 100       |
| Wine 5       | 0        | 0        | 0        | 0        | 6        | 0        | 0        | 0        | 100       |
| Wine 6       | 0        | 1        | 0        | 0        | 0        | 5        | 0        | 0        | 83        |
| Wine 7       | 0        | 0        | 0        | 0        | 0        | 0        | 6        | 0        | 100       |
| Wine 8       | 0        | 0        | 0        | 0        | 0        | 0        | 0        | 6        | 100       |
| <b>Total</b> | <b>6</b> | <b>7</b> | <b>6</b> | <b>6</b> | <b>6</b> | <b>5</b> | <b>6</b> | <b>6</b> | <b>98</b> |

**Table S22** Data matrix for the fluorescence response of the array sensor to unknown wine samples.

| Fluorescence Response Pattern |          |          | Results LDA |          |          | Analyte |                |              |
|-------------------------------|----------|----------|-------------|----------|----------|---------|----------------|--------------|
| PDI-1                         | PDI-2    | PDI-3    | Factor1     | Factor2  | Factor3  | Group   | Identification | Verification |
| -0.20372                      | -0.21274 | -0.22818 | -5.23960    | 4.41241  | 4.60344  | 1       | Wine 1         | Wine 1       |
| -0.21499                      | -0.18094 | -0.18479 | -4.44654    | 3.28319  | 0.25297  | 1       | Wine 1         | Wine 1       |
| -0.21241                      | -0.18530 | -0.23502 | -5.43570    | 1.63253  | 3.49079  | 1       | Wine 1         | Wine 1       |
| -0.19573                      | -0.17697 | -0.18023 | -2.62869    | 3.16769  | 0.74485  | 1       | Wine 1         | Wine 1       |
| -0.18616                      | -0.15762 | -0.13867 | -0.43402    | 3.14807  | -2.00714 | 2       | Wine 2         | Wine 2       |
| -0.16930                      | -0.15652 | -0.17605 | 0.19336     | 1.57314  | 0.94034  | 2       | Wine 2         | Wine 2       |
| -0.17303                      | -0.16289 | -0.15116 | 0.26506     | 3.15215  | -0.43957 | 2       | Wine 2         | Wine 2       |
| -0.17110                      | -0.14425 | -0.13456 | 1.25497     | 2.15458  | -2.06522 | 2       | Wine 2         | Wine 2       |
| -0.20260                      | -0.14691 | -0.17045 | -2.24381    | 0.83620  | -1.35888 | 2       | Wine 2         | Wine 3       |
| -0.20670                      | -0.12879 | -0.20656 | -2.92558    | -2.28356 | -0.16528 | 3       | Wine 3         | Wine 3       |
| -0.20290                      | -0.14709 | -0.22119 | -3.38252    | -1.21936 | 1.60459  | 3       | Wine 3         | Wine 3       |
| -0.22352                      | -0.14082 | -0.19642 | -4.41731    | -0.83432 | -1.07906 | 3       | Wine 3         | Wine 3       |
| -0.24140                      | -0.16240 | -0.23592 | -7.32194    | -0.55409 | 1.24480  | 3       | Wine 3         | Wine 4       |
| -0.25246                      | -0.13856 | -0.25799 | -8.13931    | -3.63718 | 1.05530  | 4       | Wine 4         | Wine 4       |

|          |          |          |          |          |          |   |        |        |
|----------|----------|----------|----------|----------|----------|---|--------|--------|
| -0.23366 | -0.13232 | -0.24658 | -6.15408 | -3.67903 | 1.03347  | 4 | Wine 4 | Wine 4 |
| -0.24079 | -0.13463 | -0.23664 | -6.59430 | -3.08537 | 0.20470  | 4 | Wine 4 | Wine 4 |
| -0.12893 | -0.09701 | -0.14627 | 5.72070  | -2.45865 | -1.26183 | 5 | Wine 5 | Wine 5 |
| -0.12372 | -0.10805 | -0.15350 | 5.72561  | -1.74292 | -0.14791 | 5 | Wine 5 | Wine 5 |
| -0.11951 | -0.10308 | -0.16678 | 5.91269  | -2.72046 | 0.63101  | 5 | Wine 5 | Wine 5 |
| -0.11163 | -0.09679 | -0.14807 | 7.14095  | -2.50056 | -0.34051 | 5 | Wine 5 | Wine 5 |
| -0.17394 | -0.17732 | -0.14663 | -0.07197 | 4.63577  | -0.17038 | 6 | Wine 6 | Wine 6 |
| -0.16362 | -0.18135 | -0.12382 | 1.19405  | 5.96058  | -0.85208 | 6 | Wine 6 | Wine 6 |
| -0.16073 | -0.16811 | -0.13864 | 1.44294  | 4.17003  | -0.37715 | 6 | Wine 6 | Wine 6 |
| -0.17343 | -0.15182 | -0.12820 | 1.00953  | 3.09070  | -2.24499 | 2 | Wine 2 | Wine 6 |
| -0.14343 | -0.14653 | -0.17363 | 2.66982  | 0.84691  | 1.63106  | 7 | Wine 7 | Wine 7 |
| -0.14172 | -0.15214 | -0.15274 | 3.13015  | 2.21093  | 0.71498  | 7 | Wine 7 | Wine 7 |
| -0.15409 | -0.15169 | -0.16988 | 1.72762  | 1.43385  | 1.11097  | 7 | Wine 7 | Wine 7 |
| -0.15110 | -0.13928 | -0.15465 | 2.62048  | 0.94523  | -0.13509 | 7 | Wine 7 | Wine 7 |
| -0.12299 | -0.08724 | -0.21616 | 4.93615  | -6.17543 | 2.72135  | 8 | Wine 8 | Wine 8 |
| -0.13359 | -0.09023 | -0.20285 | 4.26177  | -5.39405 | 1.55706  | 8 | Wine 8 | Wine 8 |
| -0.13222 | -0.07455 | -0.20643 | 4.68892  | -6.94941 | 1.20330  | 8 | Wine 8 | Wine 8 |
| -0.13142 | -0.07648 | -0.21974 | 4.41776  | -7.31654 | 2.09814  | 8 | Wine 8 | Wine 8 |

## 12. Machine learning algorithm code

```

import matplotlib.pyplot as plt
import pandas as pd
import numpy as np
from sklearn.tree import DecisionTreeClassifier
from sklearn.ensemble import RandomForestClassifier
from sklearn.preprocessing import StandardScaler
from sklearn.model_selection import train_test_split
from sklearn.model_selection import cross_val_score
from sklearn.svm import SVC
from sklearn.discriminant_analysis import LinearDiscriminantAnalysis as LDA
from sklearn.neighbors import KNeighborsClassifier
from sklearn.model_selection import cross_val_predict
from sklearn.linear_model import LogisticRegression
from sklearn.gaussian_process import GaussianProcessClassifier
from sklearn.naive_bayes import BernoulliNB
from sklearn.metrics import accuracy_score
data=pd.read_csv("encoding='gb2312'")
x=data.iloc[ ].values
y=data.iloc[ ].values
test_size=0.4
seed=4
x_train,x_test,y_train,y_test=train_test_split(x,y,test_size=test_size,random_state=seed,stratify=y)
sc=StandardScaler()

```



```

sc.fit(x_train)
x_train=sc.transform(x_train)
x_test=sc.transform(x_test)
#LDA
lda=LDA(n_components=2)
lda=lda.fit(x_train,y_train)
#RF/DT
clf=DecisionTreeClassifier(random_state=1
                            ,max_depth=6
                            ,min_samples_leaf=2
                            ,criterion='entropy'
                            )
rfc=RandomForestClassifier(random_state=10
                            ,max_depth=3
                            ,min_samples_leaf=1
                            ,criterion='entropy'
                            ,n_estimators=100)

#SVM
for kernel in ["poly"]:
    svr=SVC(kernel=kernel
            ,gamma="auto"
            ,degree=1
            ,cache_size=5000
            ).fit(x_train,y_train)
    result=svr.predict(x_test)
    score=svr.score(x_test,y_test)

#LR
LR=LogisticRegression(random_state=0)
LR.fit(x_train,y_train)
#KNN
KNN = KNeighborsClassifier(n_neighbors=1, algorithm = 'ball_tree')
KNN = KNN.fit(x_train, y_train)
#Naive Bayes
BNB = BernoulliNB()
BNB = BNB.fit(x_train,y_train)
#GPC
gpc = GaussianProcessClassifier(random_state=0)
gpc = gpc.fit(x_train, y_train)
#Naive Bayes_train
score_BNB1 = cross_val_score(BNB,x_train,y_train,cv=6)
BNB_train = score_BNB1.mean()
BNB_train
np.std(score_BNB1 ,ddof = 1)
#Naive Bayes_test

```

```

score_BNB2 = cross_val_score(BNB,x_test,y_test,cv=4)
BNB_test = score_BNB2.mean()
BNB_test
np.std(score_BNB2 ,ddof = 1)
#GCP_train
score_gpc1 = cross_val_score(gpc,x_train,y_train,cv=6)
gpc_train = score_gpc1.mean()
gpc_train
np.std(score_gpc1 ,ddof = 1)
#GCP_test
score_gpc2 = cross_val_score(gpc,x_test,y_test,cv=4)
gpc_test = score_gpc2.mean()
gpc_test
np.std(score_gpc2 ,ddof = 1)
#KNN_train
score_KNN1 = cross_val_score(KNN,x_train,y_train,cv=6)
KNN_train = score_KNN1.mean()
KNN_train
np.std(score_KNN1 ,ddof = 1)
#KNN_test
score_KNN2 = cross_val_score(KNN,x_test,y_test,cv=4)
KNN_test = score_KNN2.mean()
KNN_test
np.std(score_KNN2 ,ddof = 1)
#lda_train
score_lda1 = cross_val_score(lda,x_train,y_train,cv=6)
lda_train = score_lda1.mean()
lda_train
np.std(score_lda1 ,ddof = 1)
#lda_test
score_lda2 = cross_val_score(lda,x_test,y_test,cv=4)
lda_test = score_lda2.mean()
lda_test
np.std(score_lda2 ,ddof = 1)
#RF_train
score_rfc1 = cross_val_score(rfc,x_train,y_train,cv=6)
rfc_train = score_rfc1.mean()
rfc_train
np.std(score_rfc1 ,ddof = 1)
#RF_test
score_rfc2 = cross_val_score(rfc,x_test,y_test,cv=4)
rfc_test = score_rfc2.mean()
rfc_test
np.std(score_rfc2 ,ddof = 1)

```

```

#DT_train
score_clf1 = cross_val_score(clf,x_train,y_train,cv=6)
clf_train = score_clf1.mean()
clf_train
np.std(score_clf1 ,ddof = 1)
#DT_test
score_clf2 = cross_val_score(clf,x_test,y_test,cv=4)
clf_test = score_clf2.mean()
clf_test
np.std(score_clf2 ,ddof = 1)
#SVM_train
score_svm1 = cross_val_score(svr,x_train,y_train,cv=6)
svm_train = score_svm1.mean()
svm_train
np.std(score_svm1 ,ddof = 1)
#SVM_test
score_svm2 = cross_val_score(svr,x_test,y_test,cv=4)
svm_test = score_svm2.mean()
svm_test
np.std(score_svm2 ,ddof = 1)
#LR_train
score_LR1 = cross_val_score(LR,x_train,y_train,cv=6)
LR_train = score_LR1.mean()
LR_train
np.std(score_LR1 ,ddof = 1)
#LR_test
score_LR2 = cross_val_score(LR,x_test,y_test,cv=4)
LR_train = score_LR2.mean()
LR_train
np.std(score_LR2 ,ddof = 1)

```
